1 ***Title***

2 **Genome-wide macroevolutionary signatures of key innovations in**  
3 **butterflies colonizing new host plants**

4

5 ***Authors***

6 Rémi Allio<sup>1\*</sup>, Benoit Nabholz<sup>1</sup>, Stefan Wanke<sup>2</sup>, Guillaume Chomicki<sup>3</sup>, Oscar A. Pérez-  
7 Escobar<sup>4</sup>, Adam M. Cotton<sup>5</sup>, Anne-Laure Clamens<sup>6</sup>, Gaël J. Kergoat<sup>6</sup>, Felix A.H. Sperling<sup>7</sup> &  
8 Fabien L. Condamine<sup>1,7\*</sup>

9

10 ***Affiliations***

11 <sup>1</sup>*Institut des Sciences de l'Evolution de Montpellier (Université de Montpellier | CNRS | IRD*  
12 *| EPHE), Place Eugène Bataillon, 34095 Montpellier, France. <sup>2</sup>Institut für Botanik,*  
13 *Technische Universität Dresden, Zellescher Weg 20b, 01062, Dresden, Germany.*  
14 <sup>3</sup>*Department of Bioscience, Durham University, Stockton Rd, Durham DH1 3LE, UK. <sup>4</sup>Royal*  
15 *Botanic Gardens, Kew, TW9 3AB, Surrey, UK. <sup>5</sup>86/2 Moo 5, Tambon Nong Kwai, Hang*  
16 *Dong, Chiang Mai, Thailand. <sup>6</sup>CBGP, INRAE, CIRAD, IRD, Montpellier SupAgro, Univ.*  
17 *Montpellier, Montpellier, France. <sup>7</sup>University of Alberta, Department of Biological Sciences,*  
18 *Edmonton T6G 2E9, AB, Canada.*

19

20 ***Correspondence***

21 Rémi Allio: [rem.allio@yahoo.fr](mailto:rem.allio@yahoo.fr)

22 Fabien L. Condamine: [fabien.condamine@gmail.com](mailto:fabien.condamine@gmail.com)

23

24 **The exuberant proliferation of herbivorous insects is attributed to their associations**  
25 **with plants. Despite abundant studies on insect-plant interactions, we do not know**  
26 **whether host-plant shifts have impacted both genomic adaptation and species**  
27 **diversification over geological times. We show that the antagonistic insect-plant**  
28 **interaction between swallowtail butterflies and the highly toxic birthworts began 55**  
29 **million years ago in Beringia, followed by several major ancient host-plant shifts. This**  
30 **evolutionary framework provides a unique opportunity for repeated tests of genomic**  
31 **signatures of macroevolutionary changes and estimation of diversification rates across**  
32 **their phylogeny. We find that host-plant shifts in butterflies are associated with both**  
33 **genome-wide adaptive molecular evolution (more genes under positive selection) and**  
34 **repeated bursts of speciation rates, contributing to an increase in global diversification**  
35 **through time. Our study links ecological changes, genome-wide adaptations and**  
36 **macroevolutionary consequences, lending support to the importance of ecological**  
37 **interactions as evolutionary drivers over long time periods.**

38 Plants and phytophagous insects constitute most of the documented species of terrestrial  
39 organisms. To explain their staggering diversity, Ehrlich and Raven<sup>1</sup> proposed a model in  
40 which a continual arms race of attacks by herbivorous insects and new defences by their host  
41 plants is linked to species diversification via the creation of new adaptive zones, later termed  
42 the ‘escape-and-radiate’ model<sup>2</sup>. Study of insect-plant interactions has progressed  
43 tremendously since then through focus on chemistry<sup>3</sup>, phylogenetics<sup>4,5</sup>, and genomics<sup>6-9</sup>.  
44 Divergence of key gene families<sup>7-10</sup> and high speciation rates<sup>11-13</sup> have been identified after  
45 host-plant shifts, with one example linking duplication of key genes to the ability to feed on  
46 new plants and increase diversification<sup>7</sup>. However, a major knowledge gap lies in our  
47 understanding of the evolutionary linkages and drivers of host-plant shifts, genome-wide  
48 signatures of adaptations, and processes of species diversification<sup>14</sup>.

49 Here we address this gap with an emblematic group that was instrumental in Ehrlich  
50 & Raven’s model - the swallowtail butterflies (Lepidoptera: Papilionidae). First, we created  
51 an extensive phylogenetic dataset including 7 genetic markers for 71% of swallowtail species  
52 diversity (408 of ~570 described species, *Methods*). Second, we compiled host-plant  
53 preferences for each swallowtail species in the dataset. Their caterpillars feed on diverse  
54 flowering-plant families, and a third of swallowtail species are specialized on the flowering  
55 plant family Aristolochiaceae (birthworts), which is one of the most toxic plant groups and  
56 carcinogenic to many organisms<sup>15,16</sup>. Phylogenetic estimates of ancestral host-plant  
57 preferences indicate that Aristolochiaceae were either the foodplant of ancestral  
58 Papilionidae<sup>17</sup> or were colonized twice<sup>18</sup>, suggesting an ancient and highly conserved  
59 association with Aristolochiaceae throughout swallowtail evolution. Using a robust and  
60 newly reconstructed time-calibrated phylogeny (Supplementary Figs. 1-3), we have traced the  
61 evolutionary history of food-plant use and infer that the family Aristolochiaceae was the  
62 ancestral host for Papilionidae (**Fig. 1**; relative probabilities = 0.915, 0.789, and 0.787 with  
63 three models, Supplementary Figs. 4, 5). We further show that the genus *Aristolochia* was the  
64 ancestral host-plant, as almost all Aristolochiaceae-associated swallowtails feed on  
65 *Aristolochia* (Supplementary Fig. 6). Across the swallowtail phylogeny, we recover only 14  
66 host-plant shifts at the family level (14 nodes out of 407; Supplementary Figs. 4, 5),  
67 suggesting strong evolutionary host-plant conservatism.

68 With the ancestor of swallowtails feeding on birthworts, evidence for synchronous  
69 temporal and geographical origins further links the genus *Aristolochia* and the family  
70 Papilionidae and supports the ‘escape and radiate’ model. Reconstructions of co-phylogenetic  
71 history for other insect-plant antagonistic interactions have shown either synchronous

72 diversification<sup>5</sup> or herbivore diversification lagging behind that of their host plants<sup>4,19</sup>. We  
73 assembled a molecular dataset for ~45% of the species diversity of Aristolochiaceae (247 of  
74 ~550 described species; *Methods*) and reconstructed their phylogeny (Supplementary Fig. 7).  
75 Divergence time estimates indicate highly synchronous radiation by Papilionidae (55.4  
76 million years ago [Ma], 95% credibility intervals: 47.8-71.0 Ma) and *Aristolochia* (55.5 Ma,  
77 95% credibility intervals: 39.2-72.8 Ma) since the early Eocene (**Fig. 2**; Supplementary Figs.  
78 3, 8, 9). This result is robust to known biases in inferring divergence times, with slightly older  
79 ages inferred for both groups when using more conservative priors on clade ages  
80 (Supplementary Fig. 9). Such temporal congruence between *Aristolochia* and Papilionidae  
81 raises the question of whether both clades had similar geographical origins and dispersal  
82 routes. To characterize the macroevolutionary patterns of the *Aristolochia*/Papilionidae arms-  
83 race in space, we assembled two datasets of current geographic distributions for all species  
84 included in the phylogenies of both Aristolochiaceae and Papilionidae. We reconstructed the  
85 historical biogeography of both groups, taking into account palaeogeographical events  
86 throughout the Cenozoic (*Methods*). The results show that both Papilionidae and *Aristolochia*  
87 were ancestrally co-distributed throughout a region including West Nearctic, East Palearctic,  
88 and Central America in the early Eocene, when Asia and North America were connected by  
89 the Bering land bridge (**Fig. 2**, Supplementary Figs. 10, 11). This extraordinary combination  
90 of close temporal and spatial congruence provides strong evidence that Papilionidae and  
91 *Aristolochia* diversified concurrently through time and space until several swallowtail  
92 lineages shifted to new host-plant families in the middle Eocene.

93 Our ancestral state estimates and biogeographic analyses are consistent with a  
94 sustained arms race between *Aristolochia* and Papilionidae in the past 55 million years.  
95 According to the escape-and-radiate model, a host-plant shift should confer higher rates of  
96 species diversification for herbivores through the acquisition of novel resources to radiate  
97 into<sup>1,2</sup> and/or the lack of competitors (Aristolochiaceae-feeder swallowtails have almost no  
98 competitors<sup>20</sup>). We tested the hypothesis that increases of diversification rates occurred in  
99 swallowtail lineages that shifted to new host-plants. Applying a suite of birth-death models  
100 (*Methods*), we find evidence for (1) upshifts of diversification at host-plant shifts with trait-  
101 dependent birth-death models (**Fig. 3a**; Supplementary Figs. 12, 13, Supplementary Table 1),  
102 and (2) host-plant shifts contributing to a global increase through time with time-dependent  
103 birth-death models (**Fig. 3b**; Supplementary Figs. 14-16). Surprisingly, we do not observe the  
104 classical slowdown of diversification recovered in most phylogenies, often attributed to  
105 ecological limits and niche filling processes<sup>21</sup>. This sustained and increasing diversification



106 during the Cenozoic may be explained by ecological opportunities not decreasing, due to a  
107 steady increase in host breadth for Papilionidae with new host-plant families colonized  
108 through time (Supplementary Fig. 17). Opening up new niches would allow continuous  
109 increase in diversification rates through time in a dynamic biotic environment, lending  
110 support to the primary role of ecological interactions in clade diversification over long  
111 timescales.

112 Key innovations are often considered to underlie ecological opportunities and/or  
113 evolutionary success<sup>22</sup>, particularly in the case of chemically mediated interactions between  
114 butterflies and their host-plants<sup>7</sup>. Studies on Papilionidae have provided strong examples of  
115 specific changes in key genes that confer new abilities to feed on toxic plants and allow host-  
116 plant shifts<sup>23,24</sup>. Adaptations of swallowtails to their hosts have particularly been assessed  
117 through the study of cytochrome P450 monooxygenases (P450s), which have a major role in  
118 detoxifying secondary plant compounds. New P450s appear to arise in swallowtails that  
119 colonize new hosts to bypass toxic defences, providing survival and diversification on some  
120 but not all plants<sup>9,23,25</sup>. This supports the hypothesis that insect-plant interactions contributed  
121 to P450-gene family diversification, with P450s being key innovations that explain the  
122 evolutionary and ecological success of phytophagous insects<sup>8,9,24,26–28</sup>. However, host-plant  
123 shifts not only alter single genes but may also influence unlinked genes<sup>29</sup>. Moreover, host-  
124 plant shifts can accompany changes of abiotic environment, which may in turn require further  
125 adaptation (new predators and/or competitors). But the macroevolutionary and genomic  
126 consequences of the evolutionary dynamics of host-plant shifts have not yet been  
127 demonstrated.

128 Relying on a genomic dataset comprising 45 genomes covering all swallowtail  
129 genera<sup>30–33</sup>, we asked whether there are any genomic signatures of positive selection caused  
130 by host-plant shifts within swallowtails. We performed a comparative genomic survey of  
131 molecular evolution to test whether there is a contrasting pattern of molecular adaptation  
132 between swallowtail lineages that shifted to new host plants compared to non-shifting  
133 lineages (*Methods*). We selected 14 phylogenetic branches representing a host-plant shift and  
134 14 phylogenetic branches with no change as negative controls<sup>34,35</sup> (**Fig. 4a**). For a fair  
135 molecular comparison, each branch selected as a negative control was chosen to be as close  
136 as possible to a test branch representing a host-plant shift (i.e. sister groups, Supplementary  
137 Fig. 18). Among branches with host-plant shifts, 5 branches also had a shift in climate  
138 preference (represented by distributional changes from tropical to temperate conditions).  
139 Using a maximum-likelihood method, we estimated the ratio of non-synonymous

140 substitutions (dN) other synonymous substitutions (dS) in all branches where a host-plant  
141 shift was identified relative to branches with no host-plant shift<sup>36,37</sup> (*Methods*). The dN/dS  
142 analyses on branches with host-plant shifts (combined or not with environmental shifts)  
143 showed more genome-wide molecular adaptations (i.e. more genes under positive selection,  
144  $dN/dS > 1$ ) in lineages shifting to a new plant family, although the difference was marginally  
145 non-significant (**Fig. 4b**,  $P = 0.0501 / 0.0345$  for the two datasets, respectively, Wilcoxon  
146 rank-sum test, see *Methods* for the definition of the datasets). However, dN/dS analyses on  
147 branches with environmental shifts indicated a balanced number of genes under positive  
148 selection (**Fig. 4c**,  $P = 0.336 / 0.834$  for the two datasets, respectively, Wilcoxon rank-sum  
149 test), suggesting a lower impact of environmental shifts than host-plant shifts. We then  
150 performed dN/dS analyses for branches with host-plant shifts only (not followed by  
151 environmental shifts) and found that swallowtail lineages shifting to a new host-plant family  
152 had significantly more genes under positive selection (4.41% / 3.64% of genes under positive  
153 selection for the two datasets, respectively) than non-shifting lineages (3.02% / 2.33% of  
154 genes under positive selection for the two datasets, respectively, **Fig. 4d**,  $P = 0.0071 / 0.0152$   
155 for the two datasets, respectively, Wilcoxon rank-sum test). We checked individually the  
156 gene alignments and performed sensitivity analyses that showed our results are not driven  
157 either by an excess of misaligned regions, nor missing data and GC-content variations among  
158 species (*Methods*; Supplementary Figs. 19-25). Surprisingly, the dual changes in climate and  
159 host-plant preferences did not spur molecular adaptation across swallowtail lineages ( $P = 1 /$   
160  $0.517$  for the two datasets, respectively, Wilcoxon rank-sum test) and even less than host-  
161 plant shifts only ( $P = 0.0327 / 0.147$  for the two datasets, respectively, Wilcoxon rank-sum  
162 test; **Fig. 3d**). Although these genome-wide comparisons rely on a few branches (5 out of 14  
163 which significantly differ from others, tested with 1000 random comparisons), no plausible  
164 hypothesis can explain this result that would require more in-depth work.

165 We further studied the functional categories of positively selected genes by using  
166 gene ontology (GO) analyses (PANTHER and EggNOG; *Methods*). Applied to the high-  
167 quality genomes of *Papilio xuthus*<sup>31</sup> and *Heliconius melpomene*<sup>38</sup>, we found that ~70% of the  
168 genes are associated with a gene function, which suggests a gap of knowledge in insect gene  
169 function database. Among the annotated genes, we found that genes under positive selection  
170 along branches with host shifts did not contain over- or under-represented functional GO  
171 categories: 252 out of 1213 GO categories represented by genes under positive selection ( $P >$   
172  $0.05$ , Fisher's exact test after false discovery rate correction; Supplementary Table 2). These  
173 results support the hypothesis that genome-wide signatures of adaptations are associated with

174 host-plant shifts, and encourage extending the long-held hypothesis that only changes in a  
175 single candidate family gene are enough to act as a key innovation for adaptation to new  
176 resources<sup>7,10</sup>. Despite a weak signal, it is striking that host-plant shifts left stronger genome-  
177 wide signatures than were associated with changing climate preferences. This result further  
178 suggests that the success of phytophagous insects involved deeper adaptation to biotic  
179 interactions than for shifts in the abiotic environment.

180         Establishing linkages between ecological adaptations, genomic changes, and species  
181 diversification over geological timescales remains a tremendous challenge<sup>14</sup> with, for  
182 instance, important limitations due to the lack of knowledge in functional gene annotations in  
183 insects. However, the successful development of powerful analytical tools in conjunction  
184 with the increasing availability of insect genomes and improvements in genomic analyses<sup>39</sup>  
185 allow detecting more genes than the known genes involved in detoxification pathways  
186 playing a role in long-term relationships between plants and insects. This opens new research  
187 avenues for finding the functionality of genes involved in the adaptation and diversification  
188 of phytophagous insects. We hope that our study will help movement in that direction, and  
189 that it will provide interesting perspectives for future investigations of other model groups.

190         Over a half century ago, Ehrlich and Raven<sup>1</sup> proposed that insect-plant interactions  
191 driven by diffuse co-evolution over long evolutionary periods can be a major source of  
192 terrestrial biodiversity. Applied to a widely appreciated case in the insect-plant interactions  
193 theory, our study reveals that genome-wide adaptive processes and corresponding  
194 macroevolutionary consequences are more pervasive than previously recognized in the  
195 diversification of herbivorous insects. Close relationships between insects and their larval  
196 host plants involve more adaptations than in just the gene families in detoxification pathways  
197 that were detected through antagonist interactions<sup>39</sup>, and show genomically wide-ranging co-  
198 evolutionary consequences<sup>29,40</sup>. Hence, genome-wide macroevolutionary consequences of  
199 key adaptations in new insect-plant interactions may be a general feature of the co-  
200 evolutionary interactions that have generated Earth's diversity.

201

## 202   **References**

- 203   1.    Ehrlich, P. R. & Raven, P. H. Butterflies and plants: a study in coevolution. *Evolution*  
204        **18**, 586–608 (1964).
- 205   2.    Thompson, J. N. Concepts of coevolution. *Trends Ecol. Evol.* **4**, 179–183 (1989).
- 206   3.    Berenbaum, M. R. & Feeny, P. P. Chemical mediation of host-plant specialization: the  
207        papilionid paradigm. in *Specialization, Speciation, and Radiation: The Evolutionary*  
208        *Biology of Herbivorous Insects* (ed. Tilmon, K.) 2–19 (University of California Press,  
209        2008).
- 210   4.    Winter, S., Friedman, A. L. L., Astrin, J. J., Gottsberger, B. & Letsch, H. Timing and  
211        host plant associations in the evolution of the weevil tribe Apionini (Apioninae,  
212        Brentidae, Curculionoidea, Coleoptera) indicate an ancient co-diversification pattern of  
213        beetles and flowering plants. *Mol. Phylogenet. Evol.* **107**, 179–190 (2017).
- 214   5.    Kergoat, G. J. *et al.* Opposite macroevolutionary responses to environmental changes  
215        in grasses and insects during the Neogene grassland expansion. *Nat. Commun.* **9**, 5089  
216        (2018).
- 217   6.    Wheat, C. W. *et al.* The genetic basis of a plant–insect coevolutionary key innovation.  
218        *Proc. Natl. Acad. Sci.* **104**, 20427–20431 (2007).
- 219   7.    Edger, P. P. *et al.* The butterfly plant arms-race escalated by gene and genome  
220        duplications. *Proc. Natl. Acad. Sci. U. S. A.* **112**, 8362–8366 (2015).
- 221   8.    Calla, B. *et al.* Cytochrome P450 diversification and hostplant utilization patterns in  
222        specialist and generalist moths: Birth, death and adaptation. *Mol. Ecol.* **26**, 6021–6035  
223        (2017).
- 224   9.    Nallu, S. *et al.* The molecular genetic basis of herbivory between butterflies and their  
225        host plants. *Nat. Ecol. Evol.* **2**, 1418–1427 (2018).
- 226   10.   Karageorgi, M. *et al.* Genome editing retraces the evolution of toxin resistance in the  
227        monarch butterfly. *Nature* **574**, 409–412 (2019).
- 228   11.   Sahoo, R. K., Warren, A. D., Collins, S. C. & Kodandaramaiah, U. Hostplant change  
229        and paleoclimatic events explain diversification shifts in skipper butterflies (Family:  
230        Hesperiidae). *BMC Evol. Biol.* **17**, 174 (2017).
- 231   12.   Condamine, F. L., Rolland, J., Höhna, S., Sperling, F. A. H. & Sanmartín, I. Testing  
232        the role of the red queen and court jester as drivers of the macroevolution of apollo  
233        butterflies. *Syst. Biol.* **67**, 940–964 (2018).
- 234   13.   Letsch, H. *et al.* Climate and host-plant associations shaped the evolution of  
235        ceutorhynch weevils throughout the Cenozoic. *Evolution* **72**, 1815–1828 (2018).

- 236 14. Hua, X. & Bromham, L. Darwinism for the genomic age: connecting mutation to  
237 diversification. *Front. Genet.* **8**, 12 (2017).
- 238 15. Schmeiser, H. H., Stiborová, M. & Arlt, V. M. Chemical and molecular basis of the  
239 carcinogenicity of Aristolochia plants. *Curr. Opin. Drug Discov. Devel.* **12**, 141–148  
240 (2009).
- 241 16. Poon, S. L. *et al.* Genome-wide mutational signatures of aristolochic acid and its  
242 application as a screening tool. *Sci. Transl. Med.* **5**, 197ra101 (2013).
- 243 17. Condamine, F. L., Sperling, F. A. H., Wahlberg, N., Rasplus, J.-Y. & Kergoat, G. J.  
244 What causes latitudinal gradients in species diversity? Evolutionary processes and  
245 ecological constraints on swallowtail biodiversity. *Ecol. Lett.* **15**, 267–277 (2012).
- 246 18. Simonsen, T. J. *et al.* Phylogenetics and divergence times of Papilioninae  
247 (Lepidoptera) with special reference to the enigmatic genera *Teinopalpus* and  
248 *Meandrusa*. *Cladistics* **27**, 113–137 (2011).
- 249 19. McKenna, D. D., Sequeira, A. S., Marvaldi, A. E. & Farrell, B. D. Temporal lags and  
250 overlap in the diversification of weevils and flowering plants. *Proc. Natl. Acad. Sci. U.*  
251 *S. A.* **106**, 7083–7088 (2009).
- 252 20. Nishida, R. Sequestration of Defensive Substances from Plants by Lepidoptera. *Annu.*  
253 *Rev. Entomol.* **47**, 57–92 (2002).
- 254 21. Moen, D. & Morlon, H. Why does diversification slow down? *Trends Ecol. Evol.* **29**,  
255 190–197 (2014).
- 256 22. Losos, J. B. Adaptive radiation, ecological opportunity, and evolutionary determinism.  
257 *Am. Nat.* **175**, 623–639 (2010).
- 258 23. Cohen, M. B., Schuler, M. A. & Berenbaum, M. R. A host-inducible cytochrome P-  
259 450 from a host-specific caterpillar: molecular cloning and evolution. *Proc. Natl.*  
260 *Acad. Sci. U. S. A.* **89**, 10920–10924 (1992).
- 261 24. Berenbaum, M. R., Favret, C. & Schuler, M. A. On defining ‘Key Innovations’ in an  
262 adaptive radiation: Cytochrome P450S and Papilionidae. *Am. Nat.* **148**, S139–S155  
263 (1996).
- 264 25. Li, W., Schuler, M. A. & Berenbaum, M. R. Diversification of furanocoumarin-  
265 metabolizing cytochrome P450 monooxygenases in two papilionids: Specificity and  
266 substrate encounter rate. *Proc. Natl. Acad. Sci. U. S. A.* **100 Suppl**, 14593–14598  
267 (2003).
- 268 26. Schuler, M. A. P450s in plant–insect interactions. *Biochim. Biophys. Acta - Proteins*  
269 *Proteomics* **1814**, 36–45 (2011).

- 270 27. Cheng, T. *et al.* Genomic adaptation to polyphagy and insecticides in a major East  
271 Asian noctuid pest. *Nat. Ecol. Evol.* **1**, 1747–1756 (2017).
- 272 28. Rane, R. V *et al.* Detoxifying enzyme complements and host use phenotypes in 160  
273 insect species. *Curr. Opin. Insect Sci.* **31**, 131–138 (2019).
- 274 29. Thompson, J. N., Wehling, W. & Podolsky, R. Evolutionary genetics of host use in  
275 swallowtail butterflies. *Nature* **344**, 148–150 (1990).
- 276 30. Cong, Q., Borek, D., Otwinowski, Z. & Grishin, N. V. Tiger swallowtail genome  
277 reveals mechanisms for speciation and caterpillar chemical defense. *Cell Rep.* **10**, 910–  
278 919 (2015).
- 279 31. Li, X. *et al.* Outbred genome sequencing and CRISPR/Cas9 gene editing in butterflies.  
280 *Nat. Commun.* **6**, 8212 (2015).
- 281 32. Nishikawa, H. *et al.* A genetic mechanism for female-limited Batesian mimicry in  
282 *Papilio* butterfly. *Nat. Genet.* **47**, 405–409 (2015).
- 283 33. Allio, R. *et al.* Whole genome shotgun phylogenomics resolves the pattern and timing  
284 of swallowtail butterfly evolution. *Syst. Biol.* **69**, 38–60 (2020).
- 285 34. Thomas, G. W. C. & Hahn, M. W. Determining the null model for detecting adaptive  
286 convergence from genomic data: A case study using echolocating mammals. *Mol. Biol.*  
287 *Evol.* **32**, 1232–1236 (2015).
- 288 35. Zou, Z. & Zhang, J. No genome-wide protein sequence convergence for echolocation.  
289 *Mol. Biol. Evol.* **32**, 1237–1241 (2015).
- 290 36. Kimura, M. *The Neutral Theory of Molecular Evolution*. (Cambridge University Press,  
291 1983).
- 292 37. Yang, Z. *Computational Molecular Evolution*. (Oxford University Press, 2006).
- 293 38. Dasmahapatra, K. K. *et al.* Butterfly genome reveals promiscuous exchange of  
294 mimicry adaptations among species. *Nature* **487**, 94–98 (2012).
- 295 39. Thomas, G. W. C. *et al.* Gene content evolution in the arthropods. *Genome Biol.* **21**, 15  
296 (2020).
- 297 40. de Medeiros, B. A. S. & Farrell, B. D. Evaluating species interactions as a driver of  
298 phytophagous insect divergence. *bioRxiv* 842153 (2019). doi:10.1101/842153  
299



300 **Acknowledgements** This project has received funding from the Marie Curie International  
301 Outgoing Fellow under the European Union’s Seventh Framework Programme (project  
302 BIOMME, agreement No. 627684), a PICS grant from the CNRS (project PASTA), an  
303 “Investissement d’Avenir” grant from the Agence Nationale de la Recherche (project  
304 CASMA, CEBA, ref. ANR-10-LABX-25-01), and the European Research Council (ERC)  
305 under the European Union’s Horizon 2020 research and innovation programme (project  
306 GAIA, agreement No. 851188) to F.L.C.; a Natural Sciences and Engineering Research  
307 Council of Canada (NSERC) Discovery Grant (RGPIN-2018-04920) to F.A.H.S.; and a  
308 German Research Foundation grant (WA 2461/9-1) to S.W. We are grateful to Sophie Dang,  
309 Troy Locke, and Corey Davis at the Molecular Biology Service Unit of the University of  
310 Alberta for their help, assistance, and advice on next-generation sequencing. The analyses  
311 benefited from the Montpellier Bioinformatics Biodiversity (MBB) platform services.  
312 Finally, we are grateful to Seth Bybee, Frédéric Delsuc, Claude dePamphilis, Krushnamegh  
313 Kunte, Conrad Labandeira, Harald Letsch, Sören Nylin, Timothy O’Hara, Susanne Renner  
314 and Chris Wheat for helpful comments and discussions on earlier drafts of the study.

315

316 **Author contributions** F.L.C. and F.A.H.S. designed and conceived the research. R.A. and  
317 F.L.C. assembled the phylogenetic data for swallowtail butterflies. S.W., O.A.P.E., G.C.,  
318 F.L.C and R.A. assembled the phylogenetic data for birthworts. R.A. and F.L.C. analysed the  
319 phylogenetic data. R.A. and F.L.C. performed the ancestral states estimations. F.L.C.  
320 performed the diversification analyses. A.-L.C. and F.L.C. generated the genomic data. R.A.  
321 and B.N. assembled and analysed the genomic data. All authors contributed to the  
322 interpretation and discussion of results. R.A. and F.L.C. drafted the paper with substantial  
323 input from all authors.

324

325 **Competing interests** The authors declare no competing interests.

326



327 **Figures**

328

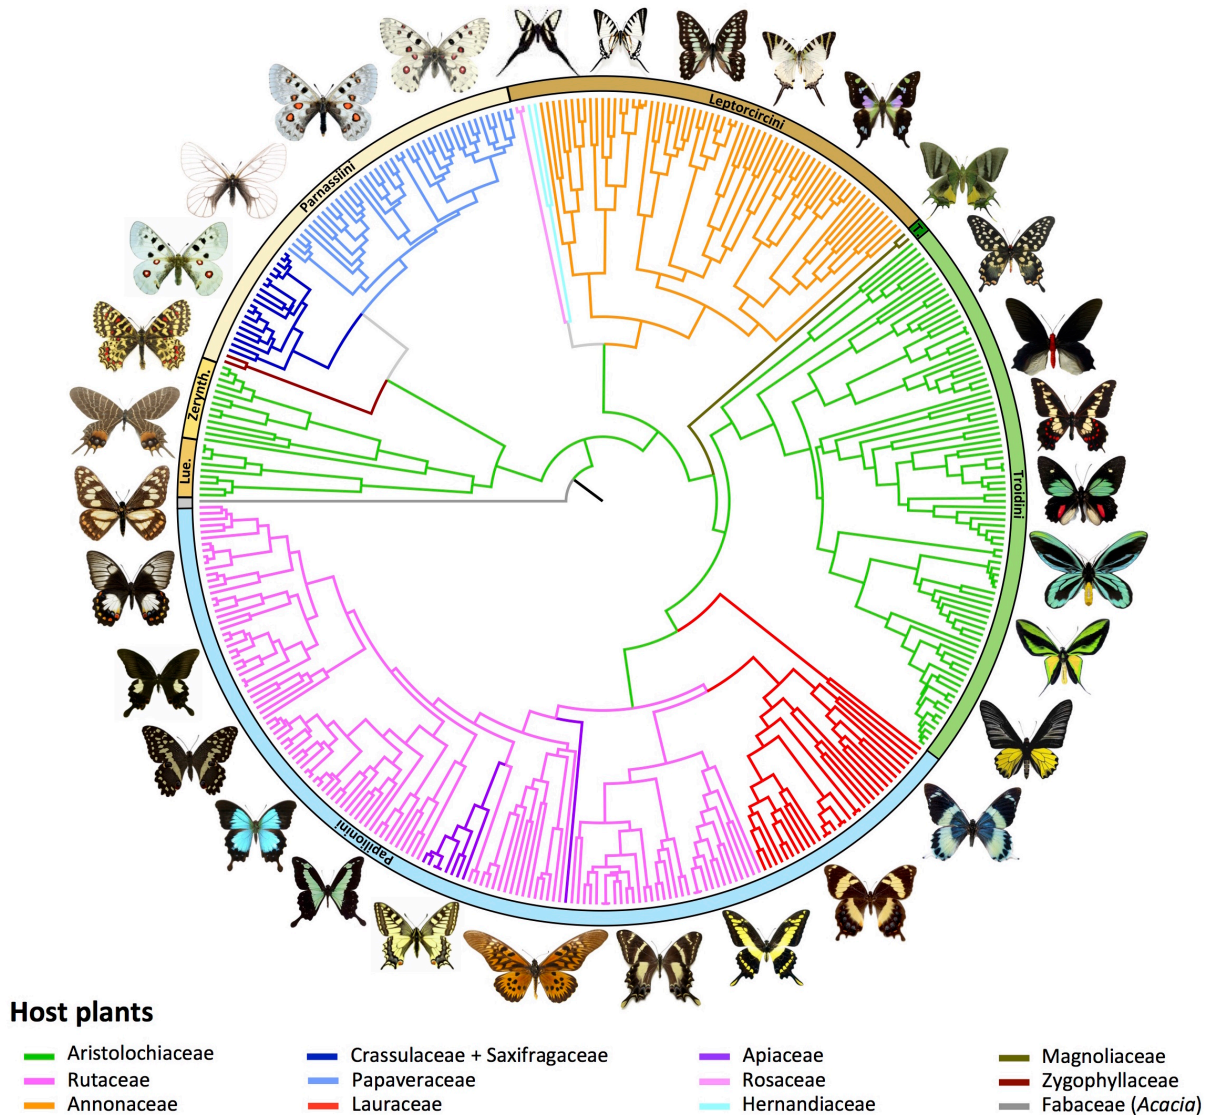

329

330

331 **Fig. 1. Evolution of host-plant association through time shows strong host-plant**  
 332 **conservatism across swallowtail butterflies.** Phylogenetic relationships of swallowtail  
 333 butterflies, with coloured branches mapping the evolution of host-plant association, as  
 334 inferred by a maximum-likelihood model (Supplementary Figs. 4, 6). Additional analyses  
 335 with two other maximum-likelihood and Bayesian models inferred the same host-plant  
 336 associations across the phylogeny (Supplementary Fig. 5). Lue. = Luehdorfini, Zerynth. =  
 337 Zerynthiini, and T. = Teinopalpini.

338

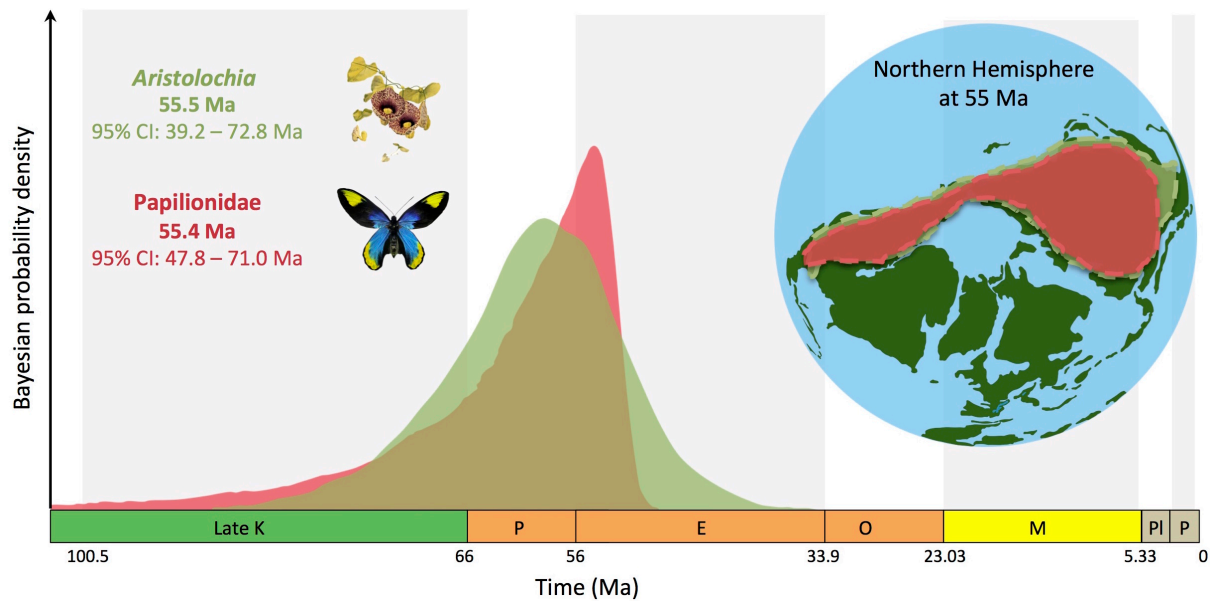

339

340

341 **Fig. 2. Synchronous temporal and geographic origin for swallowtails and birthworts.**

342 Bayesian molecular divergence times with exponential priors estimate an early Eocene origin  
343 (~55 Ma) for both swallowtails and *Aristolochia* (alternatively, analyses with uniform prior  
344 estimated an origin around 67 Ma for swallowtails and 64 Ma for *Aristolochia*,  
345 Supplementary Figs. 3, 8, 9). Biogeographical maximum-likelihood models infer an ancestral  
346 area of origin comprising West Nearctic, East Palearctic and Central America for both  
347 swallowtails and birthworts (Supplementary Figs. 10, 11). K = Cretaceous, P = Palaeocene, E  
348 = Eocene, O = Oligocene, M = Miocene, Pl = Pliocene, and P = Pleistocene. Ma = million  
349 years ago.

350

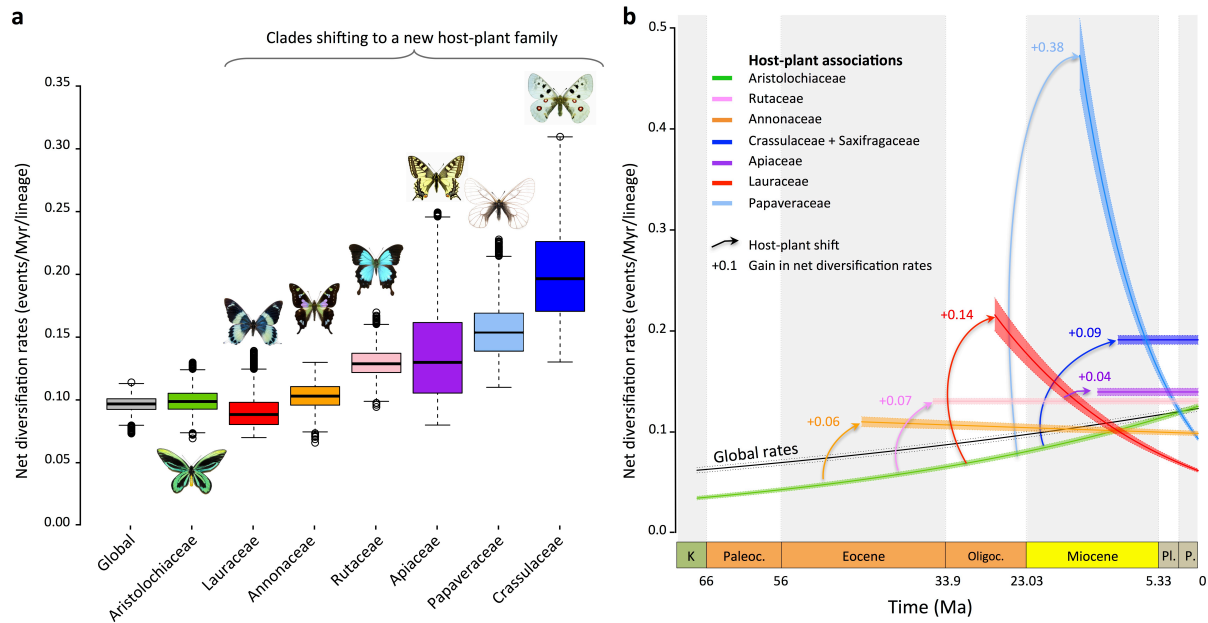

351

352

353 **Fig. 3. Host-plant shifts lead to repeated bursts in diversification rates and a sustained**

354 **overall increase in diversification through time. a**, Diversification tends to be higher for

355 clades shifting to new host plants, as estimated by trait-dependent diversification models.

356 Boxplots represent Bayesian estimates of net diversification rates for clades feeding on

357 particular host plants (see also Supplementary Fig. 12). **b**, A global increase in diversification

358 is recovered with birth-death models estimating time-dependent diversification (see also

359 Supplementary Figs. 14, 15). Taking into account rate heterogeneity by estimating host-plant

360 and clade-specific diversification indicates positive gains of net diversification after shifting

361 to new host plants (see also Supplementary Fig. 13). K = Cretaceous, Paleoc. = Palaeocene,

362 Oligoc. = Oligocene, Pl = Pliocene, P = Pleistocene, Ma = million years ago.

363

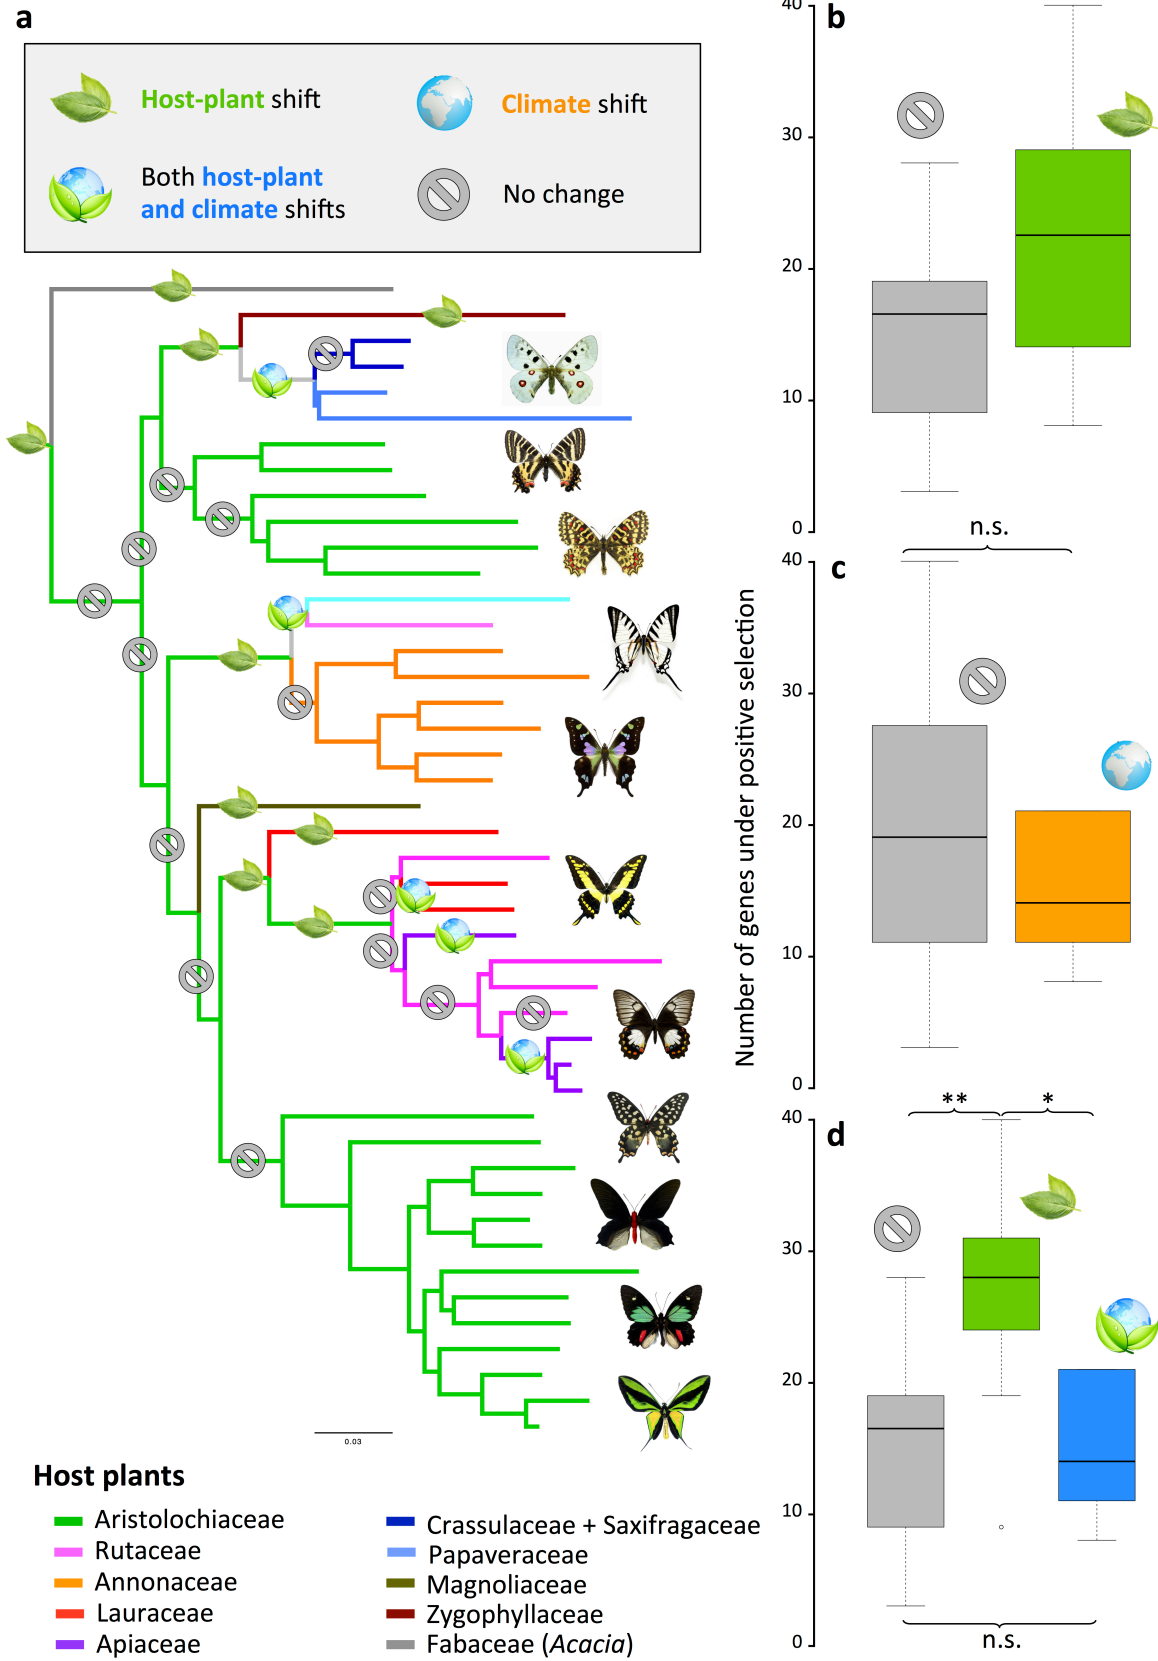

364

365

366 **Fig. 4. Host-plant shifts promote higher molecular adaptations.** **a**, Genus-level  
367 phylogenomic tree displaying branches with and without host-plant shifts, on which genome-  
368 wide analyses of molecular evolution are performed. **b**, Number of genes under positive  
369 selection ( $dN/dS > 1$ ) for swallowtail lineages shifting to new host-plant families (green) or  
370 not (grey). **c**, Number of genes under positive selection for swallowtail lineages undergoing  
371 climate shifts (orange) or not (grey). **d**, Number of genes under positive selection for  
372 swallowtail lineages shifting to new host plants (green), shifting both host plant and climate  
373 (blue) or not (grey). This demonstrates genome-wide signatures of adaptations in swallowtail  
374 lineages shifting to new host-plant families. Genes under positive selection did not contain  
375 over- or under-represented functional GO categories (Supplementary Table 2). n.s. = not  
376 significant ( $P > 0.05$ ), \* =  $P \leq 0.05$ , \*\* =  $P \leq 0.01$ .  
377

## 378 **Methods**

379 *Time-calibrated phylogeny of Papilionidae.* We assembled a supermatrix dataset with  
380 available data extracted from GenBank as of May 2017 (most of which has been generated by  
381 our research group), using five mitochondrial genes (*COI*, *COII*, *ND1*, *ND5* and *rRNA 16S*)  
382 and two nuclear markers (*EF-1a* and *Wg*) for 408 Papilionidae species (~71% of the total  
383 species diversity) and 20 outgroup species. We aligned the DNA sequences for each gene  
384 using MAFFT 7.110<sup>41</sup> with default settings (E-INS-i algorithm), and the alignments were  
385 checked for codon stops and eventually refined by eye with Mesquite 3.1 (available at:  
386 [www.mesquiteproject.org](http://www.mesquiteproject.org)). The best-fit partitioning schemes and substitution models for  
387 phylogenetic analyses were determined with PartitionFinder 2.1.1<sup>42</sup> using the *greedy* search  
388 algorithm and the Bayesian Information Criterion. All gene alignments were concatenated in  
389 a supermatrix, which is available in Figshare (see Data availability).

390 Phylogenetic relationships were estimated with both maximum likelihood (ML) and  
391 Bayesian inference. ML analyses were carried out with IQ-TREE 1.6.8<sup>43</sup>. We set the best-fit  
392 partitioning scheme and used ModelFinder to determine the best-fit substitution model for  
393 each partition<sup>44</sup> and then estimated model parameters separately for every partition<sup>45</sup> such that  
394 all partitions shared the same set of branch lengths, but we allowed each partition to have its  
395 own evolution rate. We performed 1,000 ultrafast bootstrap replicates to investigate nodal  
396 support across the topology, considering values  $\geq 95$  as strongly supported nodes<sup>46</sup>.

397 Estimating phylogenetic relationships for such a dataset is computationally intensive  
398 with Bayesian inference. The ML tree inferred with IQ-TREE was used as a starting tree for  
399 Bayesian inference as implemented in MrBayes 3.2.6<sup>47</sup>. Rather than using a single  
400 substitution model per molecular partition, we sampled across the entire substitution-model  
401 space<sup>48</sup> using reversible-jump Markov Chain Monte Carlo (rj-MCMC). Two independent  
402 analyses with one cold chain and seven heated chains, each run for 50 million generations,  
403 sampled every 5,000 generations. Convergence and performance of Bayesian runs were  
404 evaluated using Tracer 1.7.1<sup>49</sup>, the average deviation of split frequencies (ADSF) between  
405 runs, the effective sample size (ESS) and the potential scale reduction factor (PSRF) values  
406 for each parameter. A 50% majority-rule consensus tree was built after conservatively  
407 discarding 25% of sampled trees as burn-in. Node support was evaluated with posterior  
408 probability considering values  $\geq 0.95$  as strong support<sup>50</sup>. All analyses were performed on the  
409 CIPRES Science Gateway computer cluster<sup>51</sup>, using BEAGLE<sup>52</sup>.

410 Dating inferences were performed using Bayesian relaxed-clock methods accounting



411 for rate variation across lineages<sup>53</sup>. MCMC analyses implemented in BEAST 1.8.4<sup>54</sup> were  
412 employed to approximate the posterior distribution of rates and divergences times and infer  
413 their credibility intervals. Estimation of divergence times relied on constraining clade ages  
414 through fossil calibrations. Swallowtail fossils are scarce, but five can unambiguously be  
415 attributed to the family. The oldest fossil occurrences of Papilionidae are the fossils  
416 †*Praepapilio colorado* and †*Praepapilio gracilis*<sup>55</sup>, both from the Green River Formation  
417 (Colorado, USA). The Green River Formation encompasses a 5 million-years period between  
418 ~48.5 and 53.5 Ma, which falls within the Ypresian (47.8-56 Ma) in the early Eocene<sup>56</sup>.  
419 These fossils can be phylogenetically placed at the crown of the family as they share  
420 synapomorphies with all extant subfamilies<sup>57,58</sup>, and have proven to be reliable calibration  
421 points for the crown group<sup>12,17,33</sup>. Two other fossils belong to Parnassiinae, whose systematic  
422 position was assessed using phylogenetic analyses based on both morphological and  
423 molecular data in a total-evidence approach<sup>12</sup>. The first is †*Thaites ruminiana*<sup>59</sup>, a  
424 compression fossil from limestone in the Niveau du gypse d'Aix Formation of France  
425 (Bouches-du-Rhône, Aix-en-Provence, France) within the Chattian (23.03–28.1 Ma) of the  
426 late Oligocene<sup>60,61</sup>. †*Thaites* is sister to Parnassiini, and occasionally sister to Luehdorfiini +  
427 Zerynthiini<sup>12</sup>. Thus we constrained the crown age of Parnassiinae with a uniform distribution  
428 bounded by a minimum age of 23.03 Ma. The second is †*Doritites bosniaskii*<sup>62</sup>, an  
429 exoskeleton and compression fossil from Italy (Tuscany) from the Messinian (5.33–7.25 Ma,  
430 late Miocene)<sup>61</sup>. †*Doritites* is sister to *Archon* (Luehdorfiini<sup>12</sup>), in agreement with  
431 Carpenter<sup>63</sup>. The crown of Luehdorfiini was thus constrained for divergence time estimation  
432 using a uniform distribution bounded with 5.33 Ma. Absolute ages of geological formations  
433 were taken from the latest update of the geological time scale.

434 We used a conservative approach to applying calibration priors with the selected  
435 fossil constraints by setting uniform priors bounded with a minimum age equal to the  
436 youngest age of the geological formation where each fossil was found. All uniform  
437 calibration priors were set with an upper bound equal to the estimated age of angiosperms  
438 (150 Ma<sup>64</sup>), which is more than three times older than the oldest Papilionidae fossil. This  
439 upper age is intentionally set as ancient to allow exploration of potentially old ages for the  
440 clade. Since the fossil record of butterflies is incomplete and biased<sup>65</sup>, caution is needed in  
441 using these fossil calibrations (effect shown in burying beetles<sup>66</sup>).

442 After enforcing the fossil calibrations, we set the following settings and priors: a  
443 partitioned dataset (after the best-fitting PartitionFinder scheme) was analysed using the  
444 uncorrelated lognormal distribution clock model, with the mean set to a uniform prior



445 between 0 and 1, and an exponential prior ( $\lambda = 0.333$ ) for the standard deviation. The  
446 branching process prior was set to a birth–death<sup>67</sup> process, using the following uniform  
447 priors: the birth–death mean growth rate ranged between 0 and 10 with a starting value at 0.1,  
448 and the birth–death relative death rate ranged between 0 and 1 (starting value = 0.5). We  
449 performed four independent BEAST analyses for 100 million generations, sampled every  
450 10,000th, resulting in 10,000 samples in the posterior distribution of which the first 2500  
451 samples were discarded as burn-in. All analyses were performed on the CIPRES Science  
452 Gateway computer cluster<sup>51</sup>, using BEAGLE<sup>52</sup>. Convergence and performance of each  
453 MCMC run were evaluated using Tracer 1.7.1<sup>49</sup> and the ESS for each parameter. We  
454 combined the four runs using LogCombiner 1.8.4<sup>54</sup>. A maximum-clade credibility (MCC)  
455 tree was reconstructed, with median ages and 95% credibility intervals (CI). The BEAST  
456 files generated for this study are available in Figshare (see Data availability).

457

458 ***Estimating ancestral host-plant association.*** We inferred the temporal evolution of host-  
459 plant association up to the ancestral host plant(s) at the root of Papilionidae using three  
460 approaches: the ML implementation of the Markov k-state (Mk) model<sup>68</sup>, the ML Dispersal-  
461 Extinction-Cladogenesis (DEC) model<sup>69</sup>, and the Bayesian approach in BayesTraits<sup>70</sup>. These  
462 approaches require a time-calibrated tree and a matrix of character states (current host-plant  
463 preference) for each species in the tree. An extensive bibliographic survey was conducted to  
464 obtain primary larval host-plants at the family level<sup>1,71–74</sup>. The host associations of species  
465 were categorized using the following twelve character states: (1) Annonaceae, (2) Apiaceae,  
466 (3) Aristolochiaceae, (4) Crassulaceae or Saxifragaceae (core Saxifragales), (5) Fabaceae, (6)  
467 Hernandiaceae, (7) Lauraceae; (8) Magnoliaceae, (9) Papaveraceae, (10) Rosaceae, (11)  
468 Rutaceae, and (12) Zygophyllaceae. The host-plant matrix of Papilionidae is available in  
469 Figshare (see Data availability).

470 Ancestral states for host-plant association were first reconstructed using the Mk  
471 model (one rate for all transitions between states) allowing any host shift to be equally  
472 probable. The Mk model does not allow multiple states for a species. The few species that use  
473 multiple host families were thus scored with the most frequent host association. The Mk  
474 model was performed with Mesquite 3.1 (available at: [www.mesquiteproject.org](http://www.mesquiteproject.org)). To  
475 estimate the support of any one character state over another, the most likely state was selected  
476 according to a decision threshold, such that if the log likelihoods between two states differ by  
477 two log-likelihood units, the one with lower likelihood is rejected<sup>68</sup>.

478 The DEC model was also used to reconstruct ancestral host-plant states<sup>69,75</sup>. As the  
479 Mk model, we assumed that host-plant shifts occurred at equivalent probabilities between  
480 plant families and through time, which may not be true given that the host-plant families of  
481 Papilionidae did not originate at the same time (e.g. Aristolochiaceae originated around  
482 108.07 Ma [95% credibility intervals: 81.01-132.66 Ma]<sup>76</sup>, and Annonaceae originated about  
483 98.94 Ma [95% credibility intervals: 84.78-113.70 Ma]<sup>76</sup>). We used the estimated molecular  
484 ages of the different host-plant groups to constrain our inferences of ancestral host plants *a*  
485 *posteriori*. We preferred such an approach compared to a more constrained one in which the  
486 DEC model is informed with a matrix of host-plant appearances based on their estimated ages  
487 by implementing matrices of presence/absence of the character states through time  
488 (equivalent to the time-stratified palaeogeographic model, see below for inference of  
489 biogeographical history).

490 Finally, the Bayesian approach implemented in BayesTraits 3.0.1<sup>70</sup> was performed to  
491 provide a cross-validation of ML analyses. This approach automatically detects shifts in rates  
492 of evolution for multistate data using rj-MCMC. Numbers of parameters and priors were set  
493 by default. We ran the rj-MCMC for 10 million generations and sampled states and  
494 parameters every 1,000 generations (burn-in of 10,000 generations). We specifically  
495 estimated ancestral states at 21 nodes as well as at the root of Papilionidae. For this analysis,  
496 we used a set of 100 trees randomly taken from the dating analysis to probe the robustness of  
497 our ancestral state estimation across topological uncertainty.

498 The results of these inferences determined the host-plant family(ies) that was (were)  
499 the most likely ancestral host(s) at the origin of Papilionidae, indicating (i) which plant  
500 phylogeny to reconstruct for studying the macroevolution of the arms race, and (ii) the  
501 evolution of ancestral host-plant association along the phylogeny to identify the tree branches  
502 where shifts occurred and test for genome-wide changes.

503 The Mk and BayesTraits models always inferred with high support (relative  
504 probability = 0.915 and 0.789, respectively) that Aristolochiaceae is the ancestral host plant at  
505 the crown of Papilionidae. With the unconstrained DEC model, we found that the ancestral  
506 host-plant preference for Papilionidae was always composed of Aristolochiaceae, but also  
507 included another family (either Fabaceae, Hernandiaceae or Zygophyllaceae, which are only  
508 fed upon by *Baronia*, *Lamproptera* and *Hypermnestra*, respectively). As the sister lineage to  
509 all other Papilionidae, *Baronia* is the only species that feeds on Fabaceae. More precisely,  
510 only one species of Fabaceae is consumed: *Vachellia cochliacantha* (formerly *Acacia*  
511 *cochliacantha*; recent changes in *Acacia* taxonomy<sup>77</sup>). However, *Vachellia* diverged from its

512 sister clade in the Eocene, approximately 50 Ma, and diversified in the Miocene between 13  
513 and 17 Ma<sup>78</sup>, which substantially postdate the origin of Papilionidae. Therefore this result  
514 suggests that Aristolochiaceae family represents the most likely candidate as the ancestral  
515 host-plant of Papilionidae. Hernandiaceae are consumed by *Lamproptera* (occasionally by  
516 *Papilio homerus*, *Graphium codrus*, *G. doson* and *G. empedovana*<sup>73</sup>). More precisely, the  
517 host plants of *Lamproptera* belong to the genus *Illigera*. This plant genus diverged from its  
518 sister genus 48 Ma<sup>76</sup> and started diversifying 27 Ma<sup>79</sup>. The derived phylogenetic position of  
519 *Lamproptera* and the age of its use as a host plant make it very unlikely that Hernandiaceae  
520 could constitute the ancestral host plant for Papilionidae. Similarly, the family  
521 Zygophyllaceae is consumed by *Hypermnestra*, most specifically it feeds on the genus  
522 *Zygophyllum* in Central Asia. The genus *Zygophyllum* is not monophyletic, but Asian  
523 *Zygophyllum* appeared 19.6 Ma<sup>80</sup>. Applying the same rationale, we are able to discard  
524 Zygophyllaceae as a candidate ancestral host plant for Papilionidae. To further refine our  
525 ancestral host-plant estimates, we built a presence-absence matrix of plant families based on  
526 clade origins estimated in molecular dating studies. Thereby, the age of the different plants  
527 can be used to constrain the inference of ancestral host plants. Under such a constrained  
528 model, Aristolochiaceae is always recovered as the most likely ancestral host-plant for  
529 Papilionidae. It is also interesting that almost all Aristolochiaceae feeders have *Aristolochia*  
530 as host plants, and tests to determine which genus of Aristolochiaceae was originally  
531 consumed by Papilionidae showed that it was *Aristolochia*.

532

533 ***Time-calibrated phylogeny of the ancestral host: the Aristolochiaceae.*** Estimation of  
534 ancestral host-plant relationships revealed that the family Aristolochiaceae was the ancestral  
535 host for Papilionidae. We refer to Aristolochiaceae in its traditional circumscription including  
536 the genera *Asarum*, *Saruma*, *Thottea* and *Aristolochia*. The Angiosperm Phylogeny Group<sup>81</sup>  
537 proposes that Aristolochiaceae also includes the holoparasitic genera *Hydnora* and  
538 *Prosopanche* (Hydnoraceae), as well as the monotypic family Lactoridaceae from the Juan  
539 Fernandez Islands of Chile (*Lactoris fernandeziana*). The conclusion of APG<sup>81</sup> is based on an  
540 online survey<sup>82</sup> rather than on primary data and this is why we disagree with their  
541 argumentation as well as the resulting conclusion of APG given available resilient primary  
542 molecular phylogenomic data. However, arguments based on morphology and anatomy<sup>83-86</sup>,  
543 genetics<sup>87-92</sup>, molecular divergence time<sup>76,92</sup>, and conservation considerations (Tod Stuessy,  
544 pers. comm. with S.W., July 2019) favour splitting them into four families: Aristolochiaceae  
545 (*Aristolochia* and *Thottea*), Asaraceae (*Asarum* and *Saruma*), Hydnoraceae (*Hydnora* and

546 *Prosopanche*), and Lactoridaceae (*Lactoris*), collectively called the perianth-bearing  
547 Piperales. Therefore we extracted and assembled a supermatrix dataset with available data  
548 from GenBank for the perianth-bearing Piperales and its sister lineage, the perianth-less  
549 Piperales including Saururaceae and Piperaceae (as of May 2017, most of which has been  
550 generated by our research group). We obtained four chloroplast genes (*matK*, *rbcl*, *trnL*, *trnL-*  
551 *trnF*) and one nuclear marker (*ITS*) for 247 species of perianth-bearing Piperales (~45% of  
552 the total species diversity<sup>93</sup>) and six outgroups from perianth-less Piperales. We could not  
553 include the two genera *Hydnora* and *Prosopanche* (Hydnoraceae) because available genetic  
554 data do not overlap those of perianth-bearing Piperales<sup>87,91,94,95</sup>. We applied the same  
555 analytical procedure that we did for Papilionidae. DNA sequences for each gene were aligned  
556 using MAFFT 7.110<sup>41</sup> with default settings (E-INS-i algorithm and Q-INS-I to take into  
557 account secondary structure). Resulting alignments were checked for codon stops and  
558 eventually refined by eye with Mesquite 3.1 (available at: [www.mesquiteproject.org](http://www.mesquiteproject.org)). The  
559 best-fit partitioning schemes and substitution models for phylogenetic analyses were  
560 determined with PartitionFinder 2.1.1<sup>42</sup>. All gene alignments were concatenated into a  
561 supermatrix; the final dataset is available in Figshare (see Data availability).

562 Phylogenetic relationships were estimated with Bayesian inference as implemented in  
563 MrBayes 3.2.6<sup>47</sup>. Rather than using a single substitution model per molecular partition, we  
564 sampled across the entire substitution-model space<sup>48</sup> using rj-MCMC. Two independent  
565 analyses with one cold chain and seven heated chains, each were run for 50 million  
566 generations, sampled every 5,000 generations. Convergence and performance of Bayesian  
567 runs were evaluated using Tracer 1.7.1<sup>49</sup> and the ESS, ADSF and PSRF criteria. Once  
568 convergence was achieved, a 50% majority-rule consensus tree was built after discarding  
569 25% of the sampled trees as burn-in.

570 Bayesian relaxed-clock methods were used that accounted for rate variation across  
571 lineages<sup>53</sup>. MCMC analyses implemented in BEAST 1.8.4<sup>54</sup> were employed to approximate  
572 the posterior distribution of rates and divergences times and infer their credibility intervals.  
573 Estimation of divergence times relied on constraining clade ages through fossil calibrations.  
574 Three unambiguous fossils from perianth-bearing Piperales (Aristolochiaceae *sensu lato*), and  
575 one corresponding to the family Saururaceae were used. First, we relied on the fossil record  
576 of the monotypic family Lactoridaceae (*Lactoris fernandeziana*)<sup>87,92</sup>, a shrub endemic to  
577 cloud forest of the Juan Fernández Islands archipelago of Chile. The oldest pollen fossil for  
578 the group is †*Lactoripollenites africanus*<sup>96,97</sup> from the Turonian/Campanian (72.1-89.8 Ma)  
579 of the Orange Basin in South Africa. This fossil confers a minimum age of 72.1 Ma for the

580 stem node of *Lactoris fernandeziana*. Second, the oldest and only pollen record of the  
581 Aristolochiaceae was recently described from Late Cretaceous sediments of Siberia:  
582 †*Aristolochiacidites viluiensis*<sup>98</sup> from the Timerdyakh Formation of the latest Campanian to  
583 earliest Maastrichtian (66-72.1 Ma) in the Vilui Basin (Russia). Because inaperturate pollen  
584 grains in combination with this unique exine configuration and fitting size can be observed in  
585 extant members of Aristolochiaceae, this fossil provides a minimum age of 66 Ma for the  
586 family. The third fossil belongs to the genus *Aristolochia* and described as †*Aristolochia*  
587 *austriaca*<sup>99</sup> from the Pannonian (late Miocene) in the Hollabrunn-Mistelbach Formation  
588 (Austria). Based on a thorough morphological leaf comparison, this fossil is assigned to a  
589 species group including *Aristolochia baetica* and *Aristolochia rotunda*, which then confers a  
590 minimum age of 7.25 Ma for the clade. Finally, we used the fossil †*Saururus tuckerae*<sup>100</sup>  
591 from the Princeton Chert of Princeton in British Columbia (Canada), which is part of the  
592 Princeton Group, Allenby Formation dated with stable isotopes to the middle Eocene<sup>101</sup>. This  
593 fossil has been phylogenetically placed as sister to extant *Saururus* species<sup>101</sup>, hence  
594 providing a minimum age of 44.3 Ma for the stem node of *Saururus*. Absolute ages of  
595 geological formations were taken from the latest update of the geological time scale.

596 We set the following settings and priors: a partitioned dataset (after the best-fitting  
597 PartitionFinder scheme) was analysed using the uncorrelated lognormal distribution clock  
598 model, with the mean set to a uniform prior between 0 and 1, and an exponential prior  
599 ( $\lambda = 0.333$ ) for the standard deviation. The branching process prior was set to a birth–  
600 death<sup>67</sup> process, using the following uniform priors: the birth–death mean growth rate ranged  
601 between 0 and 10 with a starting value at 0.1, and the birth–death relative death rate ranged  
602 between 0 and 1 (starting value = 0.5). We performed four independent BEAST analyses for  
603 100 million generations, sampled every 10,000th, resulting in 10,000 samples in the posterior  
604 distribution of which the first 2500 samples were discarded as burn-in. All analyses were  
605 performed on the CIPRES Science Gateway computer cluster<sup>51</sup>, using BEAGLE<sup>52</sup>.  
606 Convergence and performance of each MCMC run were evaluated using Tracer 1.7.1<sup>49</sup> and  
607 the ESS for each parameter. We combined the four runs using LogCombiner 1.8.4<sup>54</sup>. The  
608 MCC tree was reconstructed with median age and 95% CI. The BEAST files generated for  
609 this study are available in Figshare (see Data availability).

610

611 ***Dual biogeographic history of Papilionidae and Aristolochiaceae.*** We estimated the  
612 ancestral area of origin and geographic range evolution for both clades using the ML  
613 approach of DEC model<sup>69</sup> as implemented in the C++ version<sup>102,103</sup> that is available at:



614 <https://github.com/champost/DECX>. To infer the biogeographic history of a clade, DEC  
615 requires a time-calibrated tree, the current distribution of each species for a set of geographic  
616 areas, and a time-stratified geographic model that is represented by connectivity matrices for  
617 specified time intervals spanning the entire evolutionary history of the group.

618 The geographic distribution for each species in Papilionidae<sup>72–74</sup> and Aristolochiaceae  
619 was categorized as present or absent in each of the following areas: (1) West Nearctic [WN],  
620 (2) East Nearctic [EN], (3) Central America [CA], (4) South America [SA], (5) West  
621 Palearctic [WP], (6) East Palearctic [EP], (7) Madagascar [MD], (8) Indonesia and Wallacea  
622 [WA], (9) India [IN], (10) Africa [AF], and (11) Australasia [AU]. The resulting matrices of  
623 species distribution for the two groups are available in Figshare (see Data availability).

624 A time-stratified geographic model was built using connectivity matrices that take  
625 into account paleogeographic changes through time, with time slices indicating the possibility  
626 or not for a species to access a new area<sup>103</sup>. Based on palaeogeographical reconstructions<sup>104–</sup>  
627 <sup>106</sup>, we created a connectivity matrix for each geological epoch that represented a period  
628 bounded by major changes in tectonic and climatic conditions thought to have affected the  
629 distribution of organisms. The following geological epochs were selected: (i) 0 to 5.33 Ma  
630 (Pliocene to present), (ii) 5.33 to 23.03 Ma (Miocene), (iii) 23.03 to 33.9 Ma (Oligocene), (iv)  
631 33.9 to 56 Ma (Eocene), and (v) 56 Ma to the origin of the clade (Palaeocene to Late  
632 Cretaceous). For each of these five time intervals, we specified constraints on area  
633 connectivity by coding 0 if any two areas are not connected or 1 if they are connected in a  
634 given time interval. We assumed a conservative dispersal matrix with equal dispersal rates  
635 between areas through time<sup>107</sup>.

636

637 ***Impact of host-plant shifts on swallowtail diversification.*** We tested the effect of host-plant  
638 association on diversification by estimating speciation and extinction rates with five methods  
639 to cross-test hypotheses and corroborate results. Analyses were performed on 100 dated trees  
640 randomly sampled from the Bayesian dating analyses to take into account the uncertainty in  
641 age estimates. We used the following approaches: (i) ML-based trait-dependent  
642 diversification<sup>108,109</sup>; (ii) ML-based time-dependent diversification<sup>110</sup>; (iii) Bayesian analysis  
643 of macroevolutionary mixture<sup>111</sup>; (iv) Bayesian branch-specific diversification rates<sup>112</sup>; and  
644 (v) Bayesian episodic birth-death model<sup>113</sup>. It is worth mentioning that each method differs at  
645 several points in their estimation of speciation and extinction rates. For instance, trait-  
646 dependent birth-death models estimate constant speciation and extinction rates<sup>109</sup>, whereas  
647 time-dependent birth-death models estimate clade-specific speciation and extinction rates and

648 their variation through time<sup>110,112</sup>. Therefore, we expect some differences in the values of  
649 estimated diversification rates that are inherent to each approach. Our diversification analyses  
650 should be seen as complementary to the inferred diversification trend rather than  
651 corroborating the values and magnitude of speciation and extinction rates.

652 Firstly, we computed the probability of obtaining a clade as large as size  $n$ , given the  
653 crown age of origin, the overall net diversification rate of the family, and an extinction rate as  
654 a fraction of speciation rate following the approach in Condamine et al.<sup>17</sup> relying on the  
655 method of moments<sup>114</sup>. We used the R-package *LASER* 2.3<sup>115</sup> to estimate the net  
656 diversification rates of Papilionidae and six clades shifting to new host plants with the *bd.ms*  
657 function (providing crown age and total species diversity). Then we used the *crown.limits*  
658 function to estimate the mean expected clade size for each clade shifting to new host plants  
659 given clades' crown age and overall net diversification rates, and we finally computed the  
660 probability to observe such clade size using the *crown.p* function. All rate estimates were  
661 calculated with three  $\epsilon$  values ( $\epsilon=0/0.5/0.9$ ), knowing that the extinction rate in swallowtails  
662 is usually low<sup>17</sup> (supported by the results of this study).

663 First, we relied on the state-dependent speciation and extinction (SSE) model, in  
664 which speciation and extinction rates are associated with phenotypic evolution of a trait along  
665 a phylogeny<sup>108</sup>. In particular, we used the Multiple State Speciation Extinction model  
666 (MuSSE<sup>109</sup>) implemented in the R-package *diversitree* 0.9–10<sup>116</sup>, which allows multiple  
667 character states to be studied. Larval host-plant data were taken from previous works<sup>1,12,17,72–</sup>  
668 <sup>74,117</sup>. The following 10 host-plant character states and corresponding ratios of sampled  
669 species in the tree of all known species for each character (sampling fractions) were used: 1 =  
670 Aristolochiaceae (110/152), 2 = Annonaceae (69/138), 3 = Lauraceae (33/39), 4 = Apiaceae  
671 (9/10), 5 = Rutaceae (119/163), 6 = Crassulaceae (19/19), 7 = Papaveraceae (44/44), 8 =  
672 Fabaceae (1/1), 9 = Zygophyllaceae (2/2), and 10 = Magnoliaceae (2/2). Data at a lower  
673 taxonomic level than plant family were not used because of the large number of multiple  
674 associations exhibited by genera that could alter the phylogenetic signal. We assigned a  
675 single state to each species by selecting the foodplant with the maximum number of  
676 collections for each species. We did not employ multiple states per species, which represents  
677 a lesser problem because (i) few swallowtail species feed on multiple plant families, (ii)  
678 current shared-state models can only model two states, and (iii) the addition of multi-plant  
679 states to the MuSSE analysis would have greatly increased the number of parameters. We  
680 performed both ML and Bayesian MCMC analyses (10,000 steps) performed using an  
681 exponential ( $1/(2 \times \text{net diversification rate})$ ) prior with starting parameter values obtained



682 from the best-fitting ML model and resulting speciation, extinction and transition rates. After  
683 a burnin of 500 steps, we estimated posterior density distribution for speciation, extinction  
684 and transition rates. There have been concerns about the power of SSE models to infer  
685 diversification dynamics from a distribution of species traits<sup>118–120</sup>, hence other birth-death  
686 models were used to corroborate the results obtained with SSE models.

687 To provide an independent assessment of the relationship between diversification  
688 rates and host specificity, we used the ML approach of Morlon et al.<sup>110</sup> implemented in the R-  
689 package *RPANDA* 1.3<sup>121</sup>. This is a birth–death method in which speciation and/or extinction  
690 rates may change continuously through time. This method has the advantage of not assuming  
691 constant extinction rate over time (unlike BAMM<sup>111</sup>), and allows clades to have declining  
692 diversity since extinction can exceed speciation, meaning that diversification rates can be  
693 negative<sup>110</sup>. For each clade that shifted to a new host family, we designed and fitted six  
694 diversification models: (i) a Yule model, where speciation is constant and extinction is null;  
695 (ii) a constant birth-death model, where speciation and extinction rates are constant; (iii) a  
696 variable speciation rate model without extinction; (iv) a variable speciation rate model with  
697 constant extinction; (v) a rate-constant speciation and variable extinction rate model; and (vi)  
698 a model in which both speciation and extinction rates vary. Models were compared by  
699 computing the ML estimate of each model and the resulting Akaike information criterion  
700 corrected by sample size (AICc) We then plotted rates through time with the best fit model  
701 for each clade, and the rates for the family as a whole for comparison purpose.

702 We also performed models that allow diversification rates to vary among clades across the  
703 whole phylogeny. BAMM 2.5<sup>111,122</sup> was used to explore for differential diversification  
704 dynamic regimes among clades differing in their host-plant feeding. BAMM can  
705 automatically detect rate shifts and sample distinct evolutionary dynamics that explain the  
706 diversification dynamics of a clade without *a priori* hypotheses on how many and where  
707 these shifts might occur. Evolutionary dynamics can involve time-variable diversification  
708 rates; in BAMM, speciation is allowed to vary exponentially through time while extinction is  
709 maintained constant: subclades in a tree may diversify faster (or slower) than others. This  
710 Bayesian approach can be useful in detecting shifts of diversification potentially associated  
711 with key innovations<sup>123</sup>. BAMM analyses were run with four MCMC for 10 million  
712 generations, sampling every 10,000<sup>th</sup> and with three different values (1, 5 and 10) of the  
713 compound Poisson prior (CPP) to ensure the posterior is independent of the prior<sup>124</sup>. We  
714 accounted for non-random incomplete taxon sampling using the implemented analytical  
715 correction; we set a sampling fraction per genus based on the known species diversity of each

716 genus. Mixing and convergence among runs ( $ESS \geq 200$  after 15% burn-in) were assessed  
717 with the R-package *BAMMtools* 2.1<sup>125</sup> to estimate (i) the mean global rates of diversification  
718 through time, (ii) the estimated number of rate shifts evaluating alternative diversification  
719 models comparing priors and posterior probabilities, and (iii) the clade-specific rates through  
720 time when a distinct macroevolutionary regime is identified.

721 BAMM has been criticized for incorrectly modelling rate-shifts on extinct lineages,  
722 that is, unobserved (extinct or unsampled) lineages inherit the ancestral diversification  
723 process and cannot experience subsequent diversification-rate shifts<sup>124,126</sup>. To solve this, we  
724 used a novel Bayesian approach implemented in RevBayes 1.0.10<sup>127</sup> that models rate shifts  
725 consistently on extinct lineages by using the SSE framework<sup>112,124</sup>. Although there is no  
726 information of rate shifts for unobserved/extinct lineages in a phylogeny including extant  
727 species only, these types of events must be accounted for in computing the likelihood. The  
728 number of rate categories is fixed in the analysis but RevBayes allows any number to be  
729 specified, thus allowing direct comparison of different macroevolutionary regimes.

730 Finally, we evaluated the impact of abrupt changes in diversification using the  
731 Bayesian episodic birth-death model of CoMET<sup>113</sup> implemented in the R-package *TESS*  
732 2.1<sup>128</sup>. These models allow detection of discrete changes in speciation and extinction rates  
733 concurrently affecting all lineages in a tree, and estimate changes in diversification rates at  
734 discrete points in time, but can also infer mass extinction events (sampling events in which  
735 the extant diversity is reduced by a fraction<sup>129</sup>). Speciation and extinction rates can change at  
736 those points but remain constant within time intervals. In addition, TESS uses independent  
737 CPPs to simultaneously detect mass extinction events and discrete changes in speciation and  
738 extinction rates, while TreePar estimates the magnitude and timing of speciation and  
739 extinction changes independently to the occurrence of mass extinctions (i.e. the three  
740 parameters cannot be estimated simultaneously due to parameter identifiability issues<sup>129</sup>). We  
741 performed two independent analyses allowing and disallowing mass extinction events. Bayes  
742 factor comparisons were used to assess model fit between models with varying number and  
743 time of changes in speciation/extinction rates and mass extinctions.

744

745 ***Detecting genome-wide adaptations during host-plant shifts.*** We analysed genomic  
746 sequence data in swallowtails that have independently shifted to new ecological (biological)  
747 traits. Similar approaches have been conducted on mammals<sup>130,131</sup> and birds<sup>132</sup>, but have been  
748 rarely implemented on arthropod groups and, to our knowledge, this is the first time over  
749 such a long geological time scale. Here we estimated swallowtail molecular evolution with

750 whole genome data and compared selection regimes on protein-coding genes along  
751 independent branches with or without host-plant shift and/or environmental shift.

752 For these analyses, we studied 45 whole genomes<sup>33</sup> covering all 32 genera of the  
753 family Papilionidae: 41 of which were previously generated by our research group added to  
754 four genomes already available<sup>30-32</sup>. In summary, raw reads (Sequence Read Archive:  
755 SRR8954507-SRR8954549) were cleaned using Trimmomatic 0.33<sup>133</sup>, and assembled into  
756 contigs and scaffolds with SOAPdenovo-63mer 2.04<sup>134</sup> to obtain whole genome assemblies  
757 (30x average read depth<sup>33</sup>). All coding DNA sequences (CDS) were retrieved from the high-  
758 quality annotated genome of *Papilio xuthus*<sup>31</sup>. To annotate the sequences of all our genomes,  
759 a BLAST search using all available CDS of *Papilio xuthus* was performed at the amino-acid  
760 level (using tblastn). For each species the recovered genes were aligned one by one with  
761 *Papilio xuthus* using TranslatorX<sup>135</sup>. This method performs alignment at the amino-acid level  
762 and preserves the open reading frame. All sites showing intraspecific variation were set to N,  
763 to conservatively avoid false informative sites. Any contamination was removed using CroCo  
764 0.1<sup>136</sup> and orthologous proteins were identified with OrthoFinder 2.2.0<sup>137</sup>. Finally, CDS  
765 alignments were strongly cleaned from misaligned sequences (gene by gene) using  
766 HMMCleaner 1.8<sup>138</sup>. A last cleaning step was performed using trimAl 1.2rev59<sup>139</sup>, which is  
767 designed to trim alignments for large-scale phylogenomic analyses. The resulting dataset  
768 comprised 6,621 genes in at least four sampled species (median of 32% of missing data),  
769 which was used to reconstruct a robust phylogenomic tree of Papilionidae<sup>33</sup> (Supplementary  
770 Fig. 18).

771 We used this genomic dataset of 45 for all consisting on all genera in which the  
772 resulting genus-level swallowtail phylogenomic tree<sup>33</sup> accurately represents the evolutionary  
773 associations with host plants as estimated using the ancestral-state analyses applied to the  
774 species-level phylogeny<sup>17</sup> (**Fig. 1**, Supplementary Figs. 4, 5). We thus transferred the  
775 inference of ancestral host-plant shifts on the phylogenomic tree and selected the branches  
776 representing a host-plant shift and branches with a shift of climate preference (in general  
777 from tropical to temperate conditions; Supplementary Fig. 10). We also selected branches  
778 with no change as negative controls<sup>34</sup>. To test the impact of these different changes on the  
779 genomes, two datasets were created, *Dataset 1* and 2. *Dataset 1* consists of 1,533 genes  
780 selected from the 6,621-gene dataset for each focal branch using three criteria: (1) the dataset  
781 is composed only of orthologous protein-coding genes (OrthoFinder 2.2<sup>137</sup>), (2) the species  
782 needed to accurately define the branch were available (i.e. crown node of the clade), and (3)  
783 for each branch, one species per tribe was available, and therefore include a different number

784 of genes per branch. *Dataset 2* comprises 520 genes necessary to define all focal branches  
785 leading to less selected genes but the same genes for all branches. As a result, 14 branches are  
786 selected to measure the impact of a host-plant shift and 14 branches are selected as controls  
787 (Supplementary Fig. 18). Within these 28 branches, some branches represent environmental  
788 shifts (from tropical to temperate climate). The genomic dataset is available in Figshare (see  
789 Data availability).

790 We studied the ratio ( $\omega$ ) of nonsynonymous/synonymous substitution rate (dN/dS) to  
791 find genes under positive selection<sup>37,140</sup>. The dN/dS ratio is traditionally used to estimate  
792 selective pressure from protein-coding sequences. If host-plant shifts have no effect on the  
793 selection of a given gene, we expect a dN/dS = 1 and the selective regime is considered  
794 neutral. However, if host-plant shifts result in positive selection on coding genes, the ratio  
795 increases such that dN/dS > 1. Finally, it is possible that host-plant shifts lead to purifying  
796 selection, thus reducing the number of non-synonymous substitutions and resulting in dN/dS  
797 < 1. Here we focused on the adaptation of Papilionidae to host plant shifts, i.e. outgroups are  
798 not studied. We tested if branches representing inferred host-plant shifts along the phylogeny  
799 of swallowtails have more genes with dN/dS > 1, representing adaptation, than branches  
800 representing host-plant conservatism. The *branch-site* models allow  $\omega$  to vary both among  
801 sites in the protein and across branches on the tree and aim to detect positive selection  
802 affecting a few sites along particular lineages. The approach described by Zhang et al.<sup>141</sup> is  
803 chosen to determine genome-wide selection regimes as performed with two maximum-  
804 likelihood models: (1) a null model assuming two site classes, one with dN/dS < 1 and one  
805 with dN/dS = 1; and (2) an alternative model adding a third site class with dN/dS > 1. The fit  
806 for including positive selection is tested using a likelihood ratio test comparing the null model  
807 with the alternative model with one degree of freedom<sup>37,142</sup>. If the alternative model is better  
808 suited to host-shift branches, it is more likely the gene was under positive selection during the  
809 host-plant shifts. For each gene, dN/dS is estimated with both the null and alternative models  
810 using CodeML implemented in PAML 4<sup>143</sup>. To test the robustness of the estimations, we used  
811 a false discovery rate test to control false positives<sup>144</sup>. Finally, we reported the number of  
812 genes under positive selection on the total gene number for each focal branch. The number of  
813 genes under positive selection was compared between branches representing host-plant shifts,  
814 environmental shifts, both plant and environmental shifts or no shifts using the non-  
815 parametric Wilcoxon signed-rank test<sup>145</sup>.

816

817 **Sensitivity analyses.** We performed several control analyses to ensure that the signal of more  
818 genes under positive selection in host-plant shifts branches is not artefactual. Specifically, we  
819 focused on missing data and GC content variation among genes known to bias dN/dS  
820 estimations. Missing data are prone to introducing misaligned regions that could create false  
821 positives in branch-site likelihood method for detecting positive selection<sup>146–148</sup>. Variations in  
822 GC content are known to impact the estimation of dN/dS mainly through the process of GC-  
823 biased gene conversion (gBGC<sup>149–151</sup>).

824 The number of missing data ('N' and '-') sites and GC content at the third codon  
825 position (GC3) were computed using a home-made C++ program created with BIO++  
826 library<sup>152</sup>. Mean GC content and missing data was calculated per gene and for each branch.  
827 For a given branch, mean GC3 and missing data were computed for the species of a clade for  
828 which the branch is the root. All statistics and graphical representations were performed using  
829 the R-packages *tidyverse*<sup>153</sup> and *cowplot*<sup>154</sup>. We found that genes under positive selection  
830 ( $PS_{\text{genes}}, n_{\text{Dataset1}} = 142, n_{\text{Dataset2}} = 407$ ) have significantly more missing data and GC3 than  
831 genes not under positive selection ( $NS_{\text{genes}}, n_{\text{Dataset1}} = 378, n_{\text{Dataset2}} = 1126; P = 0.001 / 0.02$   
832 for the two datasets, respectively, Mann-Whitney test; Supplementary Fig. 19). This result  
833 confirms that branch-site likelihood methods for detecting positive selection are sensitive to  
834 missing data, probably because of misaligned sites<sup>146,147</sup>, and that GC content that may be  
835 influenced by gBGC<sup>149</sup>.

836 Missing data was, however, heterogeneously distributed among species, ranging from  
837 less than 1% in *Papilio xuthus* to 45% in *Hypermnestra helios* (Supplementary Fig. 20). The  
838 difference in missing data between branches with ( $n = 14$ , mean missing<sub>Dataset1</sub> = 13.4%,  
839 mean missing<sub>Dataset2</sub> = 14.1%) or without host-plant shifts ( $n = 14$ , mean missing<sub>Dataset1</sub> =  
840 12.8%, mean missing<sub>Dataset2</sub> = 12.7%) is not significant ( $P = 0.83 / 1.00$  for the two datasets,  
841 respectively, Mann-Whitney test; Supplementary Fig. 21). Additionally, there is no  
842 correlation between the number of genes under positive selection and the amount of missing  
843 data ( $P = 0.33 / 0.20$  for the two datasets, respectively, Spearman's correlation test;  
844 Supplementary Fig. 22). For GC3, we also found variation between species ranging from  
845 37% in *Parnassius smintheus* to 44% in *Papilio antimachus* (Supplementary Fig. 23).  
846 Similarly to missing data, we found no significant difference between plant-shift and no  
847 plant-shift branches ( $P = 0.63 / 0.63$  for the two datasets, Mann-Whitney test; Supplementary  
848 Fig. 24) and there is no correlation between the number of genes under positive selection and  
849 GC3 ( $P = 0.20 / 0.1362$  for the two datasets, respectively, Spearman's correlation test;  
850 Supplementary Fig. 25).

851           Despite the known fact that false positives can increase with the amount of missing  
852 data, our control analyses indicate that variations in missing data and GC content do not drive  
853 the signal that more genes are under positive selection in branches that have undergone a  
854 host-plant shift. Additionally to these controls, we checked by eyes all the gene alignments at  
855 the amino-acid level for genes under positive selection in branches with and without host-  
856 plant shifts using SeaView 4<sup>155</sup>. Misaligned regions, which could lead to biased dN/dS  
857 ratios<sup>156</sup>, were not significantly more detected for genes under positive selection in branches  
858 with host-plant shifts. In some cases we found ourselves in complicated situations to  
859 discriminate between false and true positive selected genes.

860           Overall, given the our alignment checks and sensitivity analyses, we do not see any  
861 reason for biased dN/dS ratios in genes along branches with or without host-plant shifts.  
862 False positive and false negative genes can be present in the two categories of branches but,  
863 in any cases, the general pattern observed is likely to remain conserved.

864

865 **Gene ontology.** To annotate proteins of our alignment, we used the two different approaches  
866 implemented in PANTHER 14<sup>157</sup> (available at: <http://pantherdb.org/>) and EggNOG 5.0<sup>158,159</sup>  
867 (available at: <http://eggnog5.embl.de/#/app/home>). We used the HMM Scoring tool to assign  
868 PANTHER family (library version 14.1<sup>157</sup>) to the protein of *Papilio xuthus* (assembly  
869 Pxut\_1.0); similar results were obtained using another high-quality annotated genome (from  
870 *Heliconius melpomene*) as reference (assembly ASM31383v2). We performed the statistical  
871 overrepresentation test implemented on the PANTHER online website, relying on the GO  
872 categories in the PANTHER GO-Slim annotation dataset including Molecular function,  
873 Biological process, and Cellular component. Firstly, we tested if positively selected genes  
874 have over- or under-represented functional GO categories as compared to the whole set of  
875 genes (option “PANTHER Generic Mapping”). Secondly, we tested if positively selected  
876 genes involving a host-plant shift along the 14 branches have over- or under-represented  
877 functional categories. These statistical comparisons were performed with the Fisher’s exact  
878 test using the false discovery rate correction to control for false positives. Independently, we  
879 used the eggNOG-mapper v2<sup>158</sup> (<https://github.com/eggnogdb/eggnog-mapper>) and the  
880 associated Lepidoptera database (LepNOG, including the genomes of *Bombyx mori*, *Danaus*  
881 *plexippus* and *Heliconius melpomene*<sup>159</sup>) to annotate the proteins of our dataset. EggNOG  
882 uses precomputed orthologous groups and phylogenies from the database to transfer  
883 functional information from fine-grained orthologs only. We used the diamond method as



884 recommended<sup>158</sup>. Finally, we reported the known functions of proteins that were only  
885 positively selected when there was a host-plant shift in the phylogeny.

886

### 887 **Data availability**

888 All data, including supermatrix datasets (for phylogenetic analyses), phylogenetic trees, host-  
889 plant preferences, species geographic distributions, gene alignments (for dN/dS analyses) and  
890 bioinformatic scripts, that are necessary for repeating the analyses described here have been  
891 made available through the Figshare digital data repository  
892 (<https://figshare.com/s/1ce98308a3c012514857>).

893

### 894 **References**

- 895 1. Ehrlich, P. R. & Raven, P. H. Butterflies and plants: a study in coevolution. *Evolution*  
896 **18**, 586–608 (1964).
- 897 2. Thompson, J. N. Concepts of coevolution. *Trends Ecol. Evol.* **4**, 179–183 (1989).
- 898 3. Berenbaum, M. R. & Feeny, P. P. Chemical mediation of host-plant specialization: the  
899 papilionid paradigm. in *Specialization, Speciation, and Radiation: The Evolutionary*  
900 *Biology of Herbivorous Insects* (ed. Tilmon, K.) 2–19 (University of California Press,  
901 2008).
- 902 4. Winter, S., Friedman, A. L. L., Astrin, J. J., Gottsberger, B. & Letsch, H. Timing and  
903 host plant associations in the evolution of the weevil tribe Apionini (Apioninae,  
904 Brentidae, Curculionoidea, Coleoptera) indicate an ancient co-diversification pattern of  
905 beetles and flowering plants. *Mol. Phylogenet. Evol.* **107**, 179–190 (2017).
- 906 5. Kergoat, G. J. *et al.* Opposite macroevolutionary responses to environmental changes  
907 in grasses and insects during the Neogene grassland expansion. *Nat. Commun.* **9**, 5089  
908 (2018).
- 909 6. Wheat, C. W. *et al.* The genetic basis of a plant–insect coevolutionary key innovation.  
910 *Proc. Natl. Acad. Sci.* **104**, 20427–20431 (2007).
- 911 7. Edger, P. P. *et al.* The butterfly plant arms-race escalated by gene and genome  
912 duplications. *Proc. Natl. Acad. Sci. U. S. A.* **112**, 8362–8366 (2015).
- 913 8. Calla, B. *et al.* Cytochrome P450 diversification and hostplant utilization patterns in  
914 specialist and generalist moths: Birth, death and adaptation. *Mol. Ecol.* **26**, 6021–6035  
915 (2017).
- 916 9. Nallu, S. *et al.* The molecular genetic basis of herbivory between butterflies and their  
917 host plants. *Nat. Ecol. Evol.* **2**, 1418–1427 (2018).



- 918 10. Karageorgi, M. *et al.* Genome editing retraces the evolution of toxin resistance in the  
919 monarch butterfly. *Nature* **574**, 409–412 (2019).
- 920 11. Sahoo, R. K., Warren, A. D., Collins, S. C. & Kodandaramaiah, U. Hostplant change  
921 and paleoclimatic events explain diversification shifts in skipper butterflies (Family:  
922 HesperIIDae). *BMC Evol. Biol.* **17**, 174 (2017).
- 923 12. Condamine, F. L., Rolland, J., Höhna, S., Sperling, F. A. H. & Sanmartín, I. Testing  
924 the role of the red queen and court jester as drivers of the macroevolution of apollo  
925 butterflies. *Syst. Biol.* **67**, 940–964 (2018).
- 926 13. Letsch, H. *et al.* Climate and host-plant associations shaped the evolution of  
927 ceutorhynch weevils throughout the Cenozoic. *Evolution* **72**, 1815–1828 (2018).
- 928 14. Hua, X. & Bromham, L. Darwinism for the genomic age: connecting mutation to  
929 diversification. *Front. Genet.* **8**, 12 (2017).
- 930 15. Schmeiser, H. H., Stiborová, M. & Arlt, V. M. Chemical and molecular basis of the  
931 carcinogenicity of Aristolochia plants. *Curr. Opin. Drug Discov. Devel.* **12**, 141–148  
932 (2009).
- 933 16. Poon, S. L. *et al.* Genome-wide mutational signatures of aristolochic acid and its  
934 application as a screening tool. *Sci. Transl. Med.* **5**, 197ra101 (2013).
- 935 17. Condamine, F. L., Sperling, F. A. H., Wahlberg, N., Rasplus, J.-Y. & Kergoat, G. J.  
936 What causes latitudinal gradients in species diversity? Evolutionary processes and  
937 ecological constraints on swallowtail biodiversity. *Ecol. Lett.* **15**, 267–277 (2012).
- 938 18. Simonsen, T. J. *et al.* Phylogenetics and divergence times of Papilioninae  
939 (Lepidoptera) with special reference to the enigmatic genera *Teinopalpus* and  
940 *Meandrusa*. *Cladistics* **27**, 113–137 (2011).
- 941 19. McKenna, D. D., Sequeira, A. S., Marvaldi, A. E. & Farrell, B. D. Temporal lags and  
942 overlap in the diversification of weevils and flowering plants. *Proc. Natl. Acad. Sci. U.*  
943 *S. A.* **106**, 7083–7088 (2009).
- 944 20. Nishida, R. Sequestration of Defensive Substances from Plants by Lepidoptera. *Annu.*  
945 *Rev. Entomol.* **47**, 57–92 (2002).
- 946 21. Moen, D. & Morlon, H. Why does diversification slow down? *Trends Ecol. Evol.* **29**,  
947 190–197 (2014).
- 948 22. Losos, J. B. Adaptive radiation, ecological opportunity, and evolutionary determinism.  
949 *Am. Nat.* **175**, 623–639 (2010).
- 950 23. Cohen, M. B., Schuler, M. A. & Berenbaum, M. R. A host-inducible cytochrome P-  
951 450 from a host-specific caterpillar: molecular cloning and evolution. *Proc. Natl.*

- 952 *Acad. Sci. U. S. A.* **89**, 10920–10924 (1992).
- 953 24. Berenbaum, M. R., Favret, C. & Schuler, M. A. On defining ‘Key Innovations’ in an  
954 adaptive radiation: Cytochrome P450S and Papilionidae. *Am. Nat.* **148**, S139–S155  
955 (1996).
- 956 25. Li, W., Schuler, M. A. & Berenbaum, M. R. Diversification of furanocoumarin-  
957 metabolizing cytochrome P450 monooxygenases in two papilionids: Specificity and  
958 substrate encounter rate. *Proc. Natl. Acad. Sci. U. S. A.* **100 Suppl**, 14593–14598  
959 (2003).
- 960 26. Schuler, M. A. P450s in plant–insect interactions. *Biochim. Biophys. Acta - Proteins*  
961 *Proteomics* **1814**, 36–45 (2011).
- 962 27. Cheng, T. *et al.* Genomic adaptation to polyphagy and insecticides in a major East  
963 Asian noctuid pest. *Nat. Ecol. Evol.* **1**, 1747–1756 (2017).
- 964 28. Rane, R. V *et al.* Detoxifying enzyme complements and host use phenotypes in 160  
965 insect species. *Curr. Opin. Insect Sci.* **31**, 131–138 (2019).
- 966 29. Thompson, J. N., Wehling, W. & Podolsky, R. Evolutionary genetics of host use in  
967 swallowtail butterflies. *Nature* **344**, 148–150 (1990).
- 968 30. Cong, Q., Borek, D., Otwinowski, Z. & Grishin, N. V. Tiger swallowtail genome  
969 reveals mechanisms for speciation and caterpillar chemical defense. *Cell Rep.* **10**, 910–  
970 919 (2015).
- 971 31. Li, X. *et al.* Outbred genome sequencing and CRISPR/Cas9 gene editing in butterflies.  
972 *Nat. Commun.* **6**, 8212 (2015).
- 973 32. Nishikawa, H. *et al.* A genetic mechanism for female-limited Batesian mimicry in  
974 *Papilio* butterfly. *Nat. Genet.* **47**, 405–409 (2015).
- 975 33. Allio, R. *et al.* Whole genome shotgun phylogenomics resolves the pattern and timing  
976 of swallowtail butterfly evolution. *Syst. Biol.* **69**, 38–60 (2020).
- 977 34. Thomas, G. W. C. & Hahn, M. W. Determining the null model for detecting adaptive  
978 convergence from genomic data: A case study using echolocating mammals. *Mol. Biol.*  
979 *Evol.* **32**, 1232–1236 (2015).
- 980 35. Zou, Z. & Zhang, J. No genome-wide protein sequence convergence for echolocation.  
981 *Mol. Biol. Evol.* **32**, 1237–1241 (2015).
- 982 36. Kimura, M. *The Neutral Theory of Molecular Evolution*. (Cambridge University Press,  
983 1983).
- 984 37. Yang, Z. *Computational Molecular Evolution*. (Oxford University Press, 2006).
- 985 38. Dasmahapatra, K. K. *et al.* Butterfly genome reveals promiscuous exchange of

- 986 mimicry adaptations among species. *Nature* **487**, 94–98 (2012).
- 987 39. Thomas, G. W. C. *et al.* Gene content evolution in the arthropods. *Genome Biol.* **21**, 15  
988 (2020).
- 989 40. de Medeiros, B. A. S. & Farrell, B. D. Evaluating species interactions as a driver of  
990 phytophagous insect divergence. *bioRxiv* 842153 (2019). doi:10.1101/842153
- 991 41. Katoh, K. & Standley, D. M. MAFFT multiple sequence alignment software version 7:  
992 Improvements in performance and usability. *Mol. Biol. Evol.* **30**, 772–780 (2013).
- 993 42. Lanfear, R., Frandsen, P. B., Wright, A. M., Senfeld, T. & Calcott, B. PartitionFinder  
994 2: New methods for selecting partitioned models of evolution for molecular and  
995 morphological phylogenetic analyses. *Mol. Biol. Evol.* **34**, 772–773 (2016).
- 996 43. Nguyen, L.-T., Schmidt, H. A., von Haeseler, A. & Minh, B. Q. IQ-TREE: A fast and  
997 effective stochastic algorithm for estimating maximum-likelihood phylogenies. *Mol.*  
998 *Biol. Evol.* **32**, 268–274 (2015).
- 999 44. Kalyaanamoorthy, S., Minh, B. Q., Wong, T. K. F., von Haeseler, A. & Jermini, L. S.  
1000 ModelFinder: fast model selection for accurate phylogenetic estimates. *Nat. Methods*  
1001 **14**, 587–589 (2017).
- 1002 45. Chernomor, O., von Haeseler, A. & Minh, B. Q. Terrace aware data structure for  
1003 phylogenomic inference from supermatrices. *Syst. Biol.* **65**, 997–1008 (2016).
- 1004 46. Minh, B. Q., Nguyen, M. A. T. & von Haeseler, A. Ultrafast approximation for  
1005 phylogenetic bootstrap. *Mol. Biol. Evol.* **30**, 1188–1195 (2013).
- 1006 47. Ronquist, F. *et al.* MrBayes 3.2: Efficient bayesian phylogenetic inference and model  
1007 choice across a large model space. *Syst. Biol.* **61**, 539–542 (2012).
- 1008 48. Huelsenbeck, J. P., Larget, B. & Alfaro, M. E. Bayesian phylogenetic model selection  
1009 using reversible jump Markov Chain Monte Carlo. *Mol. Biol. Evol.* **21**, 1123–1133  
1010 (2004).
- 1011 49. Rambaut, A., Drummond, A. J., Xie, D., Baele, G. & Suchard, M. A. Posterior  
1012 summarization in bayesian phylogenetics using Tracer 1.7. *Syst. Biol.* **67**, 901–904  
1013 (2018).
- 1014 50. Douady, C. J., Delsuc, F., Boucher, Y., Doolittle, W. F. & Douzery, E. J. P.  
1015 Comparison of bayesian and maximum likelihood bootstrap measures of phylogenetic  
1016 reliability. *Mol. Biol. Evol.* **20**, 248–254 (2003).
- 1017 51. Miller, M. A. *et al.* A RESTful API for access to phylogenetic tools via the CIPRES  
1018 Science Gateway. *Evol. Bioinforma.* **11**, EBO.S21501 (2015).
- 1019 52. Ayres, D. L. *et al.* BEAGLE: An application programming interface and high-

- 1020 performance computing library for statistical phylogenetics. *Syst. Biol.* **61**, 170–173  
1021 (2012).
- 1022 53. Drummond, A. J., Ho, S. Y. W., Phillips, M. J. & Rambaut, A. Relaxed phylogenetics  
1023 and dating with confidence. *PLoS Biol.* **4**, e88 (2006).
- 1024 54. Drummond, A. J., Suchard, M. A., Xie, D. & Rambaut, A. Bayesian phylogenetics  
1025 with BEAUti and the BEAST 1.7. *Mol. Biol. Evol.* **29**, 1969–1973 (2012).
- 1026 55. Durden, C. J. & Rose, H. *Butterflies from the middle Eocene: the earliest occurrence*  
1027 *of fossil Papilionoidea (Lepidoptera)*. (Prarce-Sellards Ser. Tax. Mem. Mus., 1978).
- 1028 56. Smith, M. E., Singer, B. & Carroll, A.  $^{40}\text{Ar}/^{39}\text{Ar}$  geochronology of the Eocene Green  
1029 River Formation, Wyoming. *Geol. Soc. Am. Bull.* **115**, 549–565 (2003).
- 1030 57. de Jong, R. Estimating time and space in the evolution of the Lepidoptera. *Tijdschr.*  
1031 *voor Entomol.* **150**, 319–346 (2007).
- 1032 58. de Jong, R. Fossil butterflies, calibration points and the molecular clock (Lepidoptera:  
1033 Papilionoidea). *Zootaxa* **4270**, 1–63 (2017).
- 1034 59. Scudder, S. H. Fossil butterflies. *Mem. Am. Assoc. Adv. Sci.* **1**, 1–99 (1875).
- 1035 60. Rasnitsyn, A. P. & Zherikhin, V. V. Appendix: Alphabetic list of selected insect fossil  
1036 sites. in *History of Insects* 437–446 (Kluwer Academic Publishers, 2002).  
1037 doi:10.1007/0-306-47577-4\_4
- 1038 61. Sohn, J., Labandeira, C., Davis, D. & Mitter, C. An annotated catalog of fossil and  
1039 subfossil Lepidoptera (Insecta: Holometabola) of the world. *Zootaxa* **3286**, 1–132  
1040 (2012).
- 1041 62. Rebel, H. *Doritites bosniaskii*. Sitzungsberichte der akademie der wissenschaften.  
1042 Mathematischen-Naturwissenschaftliche classe. *Abteilung I Mineral. Biol. Erdkd.* **1**,  
1043 734–741 (1898).
- 1044 63. Carpenter, F. *Treatise on Invertebrate Paleontology: Arthropoda 4. Superclass*  
1045 *Hexapoda*. Geological Society of America (1992).
- 1046 64. Magallón, S., Gómez-Acevedo, S., Sánchez-Reyes, L. L. & Hernández-Hernández, T.  
1047 A metacalibrated time-tree documents the early rise of flowering plant phylogenetic  
1048 diversity. *New Phytol.* **207**, 437–453 (2015).
- 1049 65. Sohn, J.-C., Labandeira, C. C. & Davis, D. R. The fossil record and taphonomy of  
1050 butterflies and moths (Insecta, Lepidoptera): implications for evolutionary diversity  
1051 and divergence-time estimates. *BMC Evol. Biol.* **15**, 12 (2015).
- 1052 66. Toussaint, E. F. A. & Condamine, F. L. To what extent do new fossil discoveries

- 1053 change our understanding of clade evolution? A cautionary tale from burying beetles  
1054 (Coleoptera: *Nicrophorus*). *Biol. J. Linn. Soc.* **117**, 686–704 (2016).
- 1055 67. Gernhard, T. The conditioned reconstructed process. *J. Theor. Biol.* **253**, 769–778  
1056 (2008).
- 1057 68. Lewis, P. O. A likelihood approach to estimating phylogeny from discrete  
1058 morphological character data. *Syst. Biol.* **50**, 913–925 (2001).
- 1059 69. Ree, R. H. & Smith, S. A. Maximum likelihood inference of geographic range  
1060 evolution by dispersal, local extinction, and cladogenesis. *Syst. Biol.* **57**, 4–14 (2008).
- 1061 70. Pagel, M. & Meade, A. Bayesian analysis of correlated evolution of discrete characters  
1062 by reversible-jump Markov chain Monte Carlo. *Am. Nat.* **167**, 808–25 (2006).
- 1063 71. Igarashi, S. The classification of the Papilionidae mainly based on the morphology of  
1064 their immature stages. *Lepid. Sci.* **34**, 41–96 (1984).
- 1065 72. Collins, N. M. & Morris, M. *Threatened swallowtail butterflies of the world: the IUCN*  
1066 *red data book*. (IUCN, 1985).
- 1067 73. Tyler, H. A., Brown, K. S. & Wilson, K. H. *Swallowtail Butterflies of the Americas: A*  
1068 *Study in Biological Dynamics, Ecological Diversity, Biosystematics, and*  
1069 *Conservation*. (Scientific Publishers, 1994).
- 1070 74. Scriber, J., Tsubaki, Y. & Lederhouse, R. *Swallowtail Butterflies: Their Ecology and*  
1071 *Evolutionary Biology*. (Scientific Publishers, 1995).
- 1072 75. Ree, R. H., Moore, B. R., Webb, C. O. & Donoghue, M. J. A likelihood framework for  
1073 inferring the evolution of geographic range on phylogenetic trees. *Evolution* **59**, 2299–  
1074 2311 (2005).
- 1075 76. Massoni, J., Couvreur, T. L. & Sauquet, H. Five major shifts of diversification through  
1076 the long evolutionary history of Magnoliidae (Angiosperms). *BMC Evol. Biol.* **15**, 49  
1077 (2015).
- 1078 77. Kyalangalilwa, B., Boatwright, J. S., Daru, B. H., Maurin, O. & van der Bank, M.  
1079 Phylogenetic position and revised classification of *Acacia s.l.* (Fabaceae:  
1080 Mimosoideae) in Africa, including new combinations in *Vachellia* and *Senegalia*. *Bot.*  
1081 *J. Linn. Soc.* **172**, 500–523 (2013).
- 1082 78. Miller, J. T., Murphy, D. J., Ho, S. Y. W., Cantrill, D. J. & Seigler, D. Comparative  
1083 dating of *Acacia*: combining fossils and multiple phylogenies to infer ages of clades  
1084 with poor fossil records. *Aust. J. Bot.* **61**, 436–445 (2013).
- 1085 79. Michalak, I., Zhang, L.-B. & Renner, S. S. Trans-Atlantic, trans-Pacific and trans-  
1086 Indian Ocean dispersal in the small Gondwanan Laurales family Hernandiaceae. *J.*

- 1087 *Biogeogr.* **37**, 1214–1226 (2010).
- 1088 80. Wu, S.-D. *et al.* Evolution of asian interior arid-zone biota: Evidence from the  
1089 diversification of asian *Zygophyllum* (Zygophyllaceae). *PLoS One* **10**, e0138697  
1090 (2015).
- 1091 81. Chase, M. W. *et al.* An update of the Angiosperm Phylogeny Group classification for  
1092 the orders and families of flowering plants: APG IV. *Bot. J. Linn. Soc.* **181**, 1–20  
1093 (2016).
- 1094 82. Christenhusz, M. J. M., Vorontsova, M. S., Fay, M. F. & Chase, M. W. Results from  
1095 an online survey of family delimitation in angiosperms and ferns: recommendations to  
1096 the Angiosperm Phylogeny Group for thorny problems in plant classification. *Bot. J.*  
1097 *Linn. Soc.* **178**, 501–528 (2015).
- 1098 83. González, F. & Rudall, P. The questionable affinities of *Lactoris*: Evidence from  
1099 branching pattern, inflorescence morphology, and stipule development. *Am. J. Bot.* **88**,  
1100 2143–2150 (2001).
- 1101 84. Gonzáles, F., Rudall, P. J. & Furness, C. A. Microsporogenesis and systematics of  
1102 Aristolochiaceae. *Bot. J. Linn. Soc.* **137**, 221–242 (2001).
- 1103 85. Isnard, S. *et al.* Growth form evolution in Piperales and its relevance for understanding  
1104 angiosperm diversification: An integrative approach combining plant architecture,  
1105 anatomy, and biomechanics. *Int. J. Plant Sci.* **173**, 610–639 (2012).
- 1106 86. Wagner, S. T. *et al.* Major trends in stem anatomy and growth forms in the perianth-  
1107 bearing Piperales, with special focus on *Aristolochia*. *Ann. Bot.* **113**, 1139–1154  
1108 (2014).
- 1109 87. Nickrent, D. L. *et al.* Molecular data place Hydnoraceae with Aristolochiaceae. *Am. J.*  
1110 *Bot.* **89**, 1809–1817 (2002).
- 1111 88. Kelly, L. M. & González, F. Phylogenetic relationships in Aristolochiaceae. *Syst. Bot.*  
1112 **28**, 236–249 (2003).
- 1113 89. Neinhuis, C., Wanke, S., Hilu, K. W., Müller, K. & Borsch, T. Phylogeny of  
1114 Aristolochiaceae based on parsimony, likelihood, and Bayesian analyses of trnL-trnF  
1115 sequences. *Plant Syst. Evol.* **250**, 7–26 (2005).
- 1116 90. Wanke, S. *et al.* Evolution of Piperales—matK gene and trnK intron sequence data  
1117 reveal lineage specific resolution contrast. *Mol. Phylogenet. Evol.* **42**, 477–497 (2007).
- 1118 91. Naumann, J. *et al.* Single-copy nuclear genes place haustorial Hydnoraceae within  
1119 piperales and reveal a cretaceous origin of multiple parasitic angiosperm lineages.  
1120 *PLoS One* **8**, e79204 (2013).



- 1121 92. Salomo, K. *et al.* The emergence of earliest angiosperms may be earlier than fossil  
1122 evidence indicates. *Syst. Bot.* **42**, 607–619 (2017).
- 1123 93. Christenhusz, M. J. M. & Byng, J. W. The number of known plants species in the  
1124 world and its annual increase. *Phytotaxa* **261**, 201–217 (2016).
- 1125 94. Naumann, J. *et al.* Detecting and characterizing the highly divergent plastid genome of  
1126 the nonphotosynthetic parasitic plant *Hydnora visseri* (Hydnoraceae). *Genome Biol.*  
1127 *Evol.* **8**, 345–363 (2016).
- 1128 95. Jost, M., Naumann, J., Rocamundi, N., Cocucci, A. A. & Wanke, S. The first plastid  
1129 genome of the Holoparasitic genus *Prosopanche* (Hydnoraceae). *Plants* **9**, 306 (2020).
- 1130 96. Zavada, M. S. & Benson, J. M. First fossil evidence for the primitive angiosperm  
1131 family Lactoricidae. *Am. J. Bot.* **74**, 1590–1594 (1987).
- 1132 97. Gamero, J. C. & Barreda, V. New fossil record of Lactoridaceae in southern South  
1133 America: A palaeobiogeographical approach. *Bot. J. Linn. Soc.* **158**, 41–50 (2008).
- 1134 98. Hofmann, C.-C. & Zetter, R. Upper Cretaceous sulcate pollen from the Timerdyakh  
1135 Formation, Vilui Basin (Siberia). *Grana* **49**, 170–193 (2010).
- 1136 99. Meller, B. The first fossil *Aristolochia* (Aristolochiaceae, Piperales) leaves from  
1137 Austria. *Palaeontol. Electron.* **17**, 1–17 (2014).
- 1138 100. Smith, S. Y. & Stockey, R. A. Establishing a fossil record for the perianthless  
1139 Piperales: *Saururus tuckeriae* sp. nov. (Saururaceae) from the Middle Eocene Princeton  
1140 Chert. *Am. J. Bot.* **94**, 1642–1657 (2007).
- 1141 101. Massoni, J., Doyle, J. & Sauquet, H. Fossil calibration of Magnoliidae, an ancient  
1142 lineage of angiosperms. *Palaeontol. Electron.* **18**, 1–25 (2015).
- 1143 102. Smith, S. A. Taking into account phylogenetic and divergence-time uncertainty in a  
1144 parametric biogeographical analysis of the Northern Hemisphere plant clade  
1145 Caprifolieae. *J. Biogeogr.* **36**, 2324–2337 (2009).
- 1146 103. Beeravolu, C. R. & Condamine, F. L. An extended maximum likelihood inference of  
1147 geographic range evolution by dispersal, local extinction and cladogenesis. *bioRxiv*  
1148 038695 (2016). doi:10.1101/038695
- 1149 104. Scotese, C. R. A continental drift flipbook. *J. Geol.* **112**, 729–741 (2004).
- 1150 105. Blakey, R. C. Gondwana paleogeography from assembly to breakup — A 500 m.y.  
1151 odyssey. *Geol. Soc. Am. Spec. Pap.* **441**, 1–28 (2008).
- 1152 106. Seton, M. *et al.* Global continental and ocean basin reconstructions since 200 Ma.  
1153 *Earth-Science Rev.* **113**, 212–270 (2012).
- 1154 107. Chacón, J. & Renner, S. S. Assessing model sensitivity in ancestral area reconstruction

- 1155 using Lagrange: A case study using the Colchicaceae family. *J. Biogeogr.* **41**, 1414–  
1156 1427 (2014).
- 1157 108. Maddison, W. P., Midford, P. E. & Otto, S. P. Estimating a binary character’s effect on  
1158 speciation and extinction. *Syst. Biol.* **56**, 701–710 (2007).
- 1159 109. FitzJohn, R. G., Maddison, W. P. & Otto, S. P. Estimating trait-dependent speciation  
1160 and extinction rates from incompletely resolved phylogenies. *Syst. Biol.* **58**, 595–611  
1161 (2009).
- 1162 110. Morlon, H., Parsons, T. L. & Plotkin, J. B. Reconciling molecular phylogenies with the  
1163 fossil record. *Proc. Natl. Acad. Sci. U. S. A.* **108**, 16327–16332 (2011).
- 1164 111. Rabosky, D. L. *et al.* Rates of speciation and morphological evolution are correlated  
1165 across the largest vertebrate radiation. *Nat. Commun.* **4**, 1958 (2013).
- 1166 112. Höhna, S. *et al.* A Bayesian approach for estimating branch-specific speciation and  
1167 extinction rates. *bioRxiv* 555805 (2019). doi:10.1101/555805
- 1168 113. May, M. R., Höhna, S. & Moore, B. R. A Bayesian approach for detecting the impact  
1169 of mass-extinction events on molecular phylogenies when rates of lineage  
1170 diversification may vary. *Methods Ecol. Evol.* **7**, 947–959 (2016).
- 1171 114. Magallon, S. & Sanderson, M. J. Absolute diversification rates in angiosperm clades.  
1172 *Evolution* **55**, 1762–1780 (2001).
- 1173 115. Rabosky, D. L. Likelihood methods for detecting temporal shifts in diversification  
1174 rates. *Evolution* **60**, 1152–1164 (2006).
- 1175 116. FitzJohn, R. G. Diversitree: Comparative phylogenetic analyses of diversification in R.  
1176 *Methods Ecol. Evol.* **3**, 1084–1092 (2012).
- 1177 117. Scriber, J. M. Host-plant suitability. in *Chemical Ecology of Insects* (eds. Bell, W. J. &  
1178 Cardé, R. T.) 159–202 (Springer US, 1984).
- 1179 118. Davis, M. P., Midford, P. E. & Maddison, W. Exploring power and parameter  
1180 estimation of the BiSSE method for analyzing species diversification. *BMC Evol. Biol.*  
1181 **13**, 38 (2013).
- 1182 119. Maddison, W. P. & FitzJohn, R. G. The unsolved challenge to phylogenetic correlation  
1183 tests for categorical characters. *Syst. Biol.* **64**, 127–136 (2015).
- 1184 120. Rabosky, D. L. & Goldberg, E. E. Model inadequacy and mistaken inferences of trait-  
1185 dependent speciation. *Syst. Biol.* **64**, 340–355 (2015).
- 1186 121. Morlon, H. *et al.* RPANDA: An R package for macroevolutionary analyses on  
1187 phylogenetic trees. *Methods Ecol. Evol.* **7**, 589–597 (2016).
- 1188 122. Rabosky, D. L., Donnellan, S. C., Grudler, M. & Lovette, I. J. Analysis and

- 1189 visualization of complex macroevolutionary dynamics: An example from australian  
1190 scincid lizards. *Syst. Biol.* **63**, 610–627 (2014).
- 1191 123. Rabosky, D. L. Automatic detection of key innovations, rate shifts, and diversity-  
1192 dependence on phylogenetic trees. *PLoS One* **9**, e89543 (2014).
- 1193 124. Moore, B. R., Höhna, S., May, M. R., Rannala, B. & Huelsenbeck, J. P. Critically  
1194 evaluating the theory and performance of Bayesian analysis of macroevolutionary  
1195 mixtures. *Proc. Natl. Acad. Sci. U. S. A.* **113**, 9569–9574 (2016).
- 1196 125. Rabosky, D. L. *et al.* BAMMtools: An R package for the analysis of evolutionary  
1197 dynamics on phylogenetic trees. *Methods Ecol. Evol.* **5**, 701–707 (2014).
- 1198 126. Rabosky, D. L., Mitchell, J. S. & Chang, J. Is BAMM flawed? Theoretical and  
1199 practical concerns in the analysis of multi-rate diversification models. *Syst. Biol.* **66**,  
1200 477–498 (2017).
- 1201 127. Höhna, S. *et al.* RevBayes: Bayesian phylogenetic inference using graphical models  
1202 and an interactive model-specification language. *Syst. Biol.* **65**, 726–736 (2016).
- 1203 128. Höhna, S., May, M. R. & Moore, B. R. TESS: An R package for efficiently simulating  
1204 phylogenetic trees and performing Bayesian inference of lineage diversification rates.  
1205 *Bioinformatics* **32**, 789–791 (2016).
- 1206 129. Stadler, T. Mammalian phylogeny reveals recent diversification rate shifts. *Proc. Natl.*  
1207 *Acad. Sci. U. S. A.* **108**, 6187–6192 (2011).
- 1208 130. Partha, R. *et al.* Subterranean mammals show convergent regression in ocular genes  
1209 and enhancers, along with adaptation to tunneling. *Elife* **6**, e25884 (2017).
- 1210 131. Wu, J., Yonezawa, T. & Kishino, H. Rates of molecular evolution suggest natural  
1211 history of life history traits and a Post-K-Pg nocturnal bottleneck of placentals. *Curr.*  
1212 *Biol.* **27**, 3025–3033 (2017).
- 1213 132. Zhang, G. *et al.* Comparative genomics reveals insights into avian genome evolution  
1214 and adaptation. *Science* **346**, 1311–1320 (2014).
- 1215 133. Bolger, A. M., Lohse, M. & Usadel, B. Trimmomatic: A flexible trimmer for Illumina  
1216 sequence data. *Bioinformatics* **30**, 2114–2120 (2014).
- 1217 134. Luo, R. *et al.* SOAPdenovo2: An empirically improved memory-efficient short-read de  
1218 novo assembler. *Gigascience* **1**, 18 (2012).
- 1219 135. Abascal, F., Zardoya, R. & Telford, M. J. TranslatorX: Multiple alignment of  
1220 nucleotide sequences guided by amino acid translations. *Nucleic Acids Res.* **38**, W7–  
1221 W13 (2010).
- 1222 136. Simion, P. *et al.* A software tool ‘CroCo’ detects pervasive cross-species

- 1223 contamination in next generation sequencing data. *BMC Biol.* **16**, 28 (2018).
- 1224 137. Emms, D. M. & Kelly, S. OrthoFinder: Phylogenetic orthology inference for  
1225 comparative genomics. *Genome Biol.* **20**, 238 (2019).
- 1226 138. Di Franco, A., Poujol, R., Baurain, D. & Philippe, H. Evaluating the usefulness of  
1227 alignment filtering methods to reduce the impact of errors on evolutionary inferences.  
1228 *BMC Evol. Biol.* **19**, 21 (2019).
- 1229 139. Capella-Gutierrez, S., Silla-Martinez, J. M. & Gabaldon, T. trimAl: A tool for  
1230 automated alignment trimming in large-scale phylogenetic analyses. *Bioinformatics*  
1231 **25**, 1972–1973 (2009).
- 1232 140. Yang, Z. & Nielsen, R. Estimating synonymous and nonsynonymous substitution rates  
1233 under realistic evolutionary models. *Mol. Biol. Evol.* **17**, 32–43 (2000).
- 1234 141. Zhang, J., Nielsen, R. & Yang, Z. Evaluation of an improved branch-site likelihood  
1235 method for detecting positive selection at the molecular level. *Mol. Biol. Evol.* **22**,  
1236 2472–2479 (2005).
- 1237 142. Yang, Z. Likelihood ratio tests for detecting positive selection and application to  
1238 primate lysozyme evolution. *Mol. Biol. Evol.* **15**, 568–573 (1998).
- 1239 143. Yang, Z. PAML 4: Phylogenetic analysis by maximum likelihood. *Mol. Biol. Evol.* **24**,  
1240 1586–1591 (2007).
- 1241 144. Benjamini, Y. & Hochberg, Y. Controlling the false discovery rate: A practical and  
1242 powerful approach to multiple testing. *J. R. Stat. Soc.* **57**, 289–300 (1995).
- 1243 145. Bauer, D. F. Constructing confidence sets using rank statistics. *J. Am. Stat. Assoc.* **67**,  
1244 687–690 (1972).
- 1245 146. Mallick, S., Gnerre, S., Muller, P. & Reich, D. The difficulty of avoiding false  
1246 positives in genome scans for natural selection. *Genome Res.* **19**, 922–933 (2009).
- 1247 147. Fletcher, W. & Yang, Z. The effect of insertions, deletions, and alignment errors on the  
1248 branch-site test of positive selection. *Mol. Biol. Evol.* **27**, 2257–2267 (2010).
- 1249 148. Jordan, G. & Goldman, N. The effects of alignment error and alignment filtering on  
1250 the sitewise detection of positive selection. *Mol. Biol. Evol.* **29**, 1125–1139 (2012).
- 1251 149. Duret, L. & Galtier, N. Biased gene conversion and the evolution of mammalian  
1252 genomic landscapes. *Annu. Rev. Genomics Hum. Genet.* **10**, 285–311 (2009).
- 1253 150. Galtier, N. & Duret, L. Adaptation or biased gene conversion? Extending the null  
1254 hypothesis of molecular evolution. *Trends Genet.* **23**, 273–277 (2007).
- 1255 151. Ratnakumar, A. *et al.* Detecting positive selection within genomes: The problem of  
1256 biased gene conversion. *Philos. Trans. R. Soc. B Biol. Sci.* **365**, 2571–2580 (2010).

- 1257 152. Guéguen, L. *et al.* Bio++: Efficient extensible libraries and tools for computational  
1258 molecular evolution. *Mol. Biol. Evol.* **30**, 1745–1750 (2013).
- 1259 153. Wickham, H. & Grolemund, G. *R for Data Science: Import, Tidy, Transform,*  
1260 *Visualize, and Model Data.* (O’Reilly Media, Inc. Canada, 2016).
- 1261 154. Wilke, C. O. cowplot: Streamlined plot theme and plot annotations for ‘ggplot2’.  
1262 *CRAN Repos* <https://cran.r-project.org/web/packages/cowplot/in> (2016).
- 1263 155. Gouy, M., Guindon, S. & Gascuel, O. SeaView version 4: A multiplatform graphical  
1264 user interface for sequence alignment and phylogenetic tree building. *Mol. Biol. Evol.*  
1265 **27**, 221–224 (2010).
- 1266 156. Redelings, B. Erasing errors due to alignment ambiguity when estimating positive  
1267 selection. *Mol. Biol. Evol.* **31**, 1979–1993 (2014).
- 1268 157. Mi, H., Muruganujan, A., Ebert, D., Huang, X. & Thomas, P. D. PANTHER version  
1269 14: More genomes, a new PANTHER GO-slim and improvements in enrichment  
1270 analysis tools. *Nucleic Acids Res.* **47**, D419–D426 (2019).
- 1271 158. Huerta-Cepas, J. *et al.* Fast genome-wide functional annotation through orthology  
1272 assignment by eggNOG-mapper. *Mol. Biol. Evol.* **34**, 2115–2122 (2017).
- 1273 159. Huerta-Cepas, J. *et al.* eggNOG 5.0: A hierarchical, functionally and phylogenetically  
1274 annotated orthology resource based on 5090 organisms and 2502 viruses. *Nucleic*  
1275 *Acids Res.* **47**, D309–D314 (2019).
- 1276

1277 **Supplementary Figures**

1278 **Supplementary Figure 1.** Phylogenetic relationships of 408 swallowtail butterfly species  
1279 (Papilionidae). Left phylogeny is inferred with the maximum-likelihood approach  
1280 implemented with IQ-TREE, and right phylogeny is inferred with the Bayesian approach  
1281 implemented with MrBayes. Both phylogenies show similar relationships except for the  
1282 placement of the genus *Teinopalpus*, found as sister to Papilionini + Troidini with IQ-TREE  
1283 and sister to *Meandrusa* (Papilionini) with MrBayes. Node support is indicated by ultrafast  
1284 bootstrap and posterior probabilities on the maximum-likelihood and Bayesian phylogenies,  
1285 respectively, with values of 95% and 0.95 considered as indicative of strong node support.

1286 **Supplementary Figure 2.** Node support (ultrafast bootstrap) of the maximum-likelihood  
1287 phylogeny. The histogram shows the distribution of node support for all Papilionidae, and  
1288 indicates a high overall tree resolution with ~80% of nodes having ultrafast bootstrap values  
1289  $\geq 95\%$ .

1290 **Supplementary Figure 3.** Bayesian estimates of divergence times for swallowtail butterflies.  
1291 The first inference was performed with exponential priors on fossil calibrations, while the  
1292 second inference was carried out with uniform priors. The analysis based on exponential  
1293 priors estimated a crown age for the family at 55.4 Ma (95% CI: 47.8-71.0 Ma), while the  
1294 analysis based on uniform priors estimated the origin at 67.2 Ma (95% CI: 47.8-112 Ma).

1295 **Supplementary Figure 4.** Estimation of ancestral host-plant preferences for the two  
1296 molecular dated trees with the Dispersal-Extinction-Cladogenesis (DEC) model. The results  
1297 show that the family Aristolochiaceae is recovered as the ancestral feeding habit of the  
1298 Papilionidae. K = Cretaceous, Pl = Pliocene, P = Pleistocene.

1299 **Supplementary Figure 5.** Estimation of ancestral host-plant preferences with the maximum-  
1300 likelihood model of Markov 1-parameter (Mk) and the Bayesian approach of BayesTraits.  
1301 The results are represented by pie charts indicating the relative probability for each state  
1302 inferred at a given node. The results consistently show that (1) the family Aristolochiaceae is  
1303 recovered as the ancestral feeding habit of the Papilionidae, and (2) the host-plant shifts are  
1304 recovered at the same nodes, except at the root of Papilionini and at the root of *Iphiclides* +  
1305 *Lamproptera* (due to the fact the the Mk model can include only 10 states).

1306 **Supplementary Figure 6.** Estimation of ancestral host-plant preferences for the  
1307 Aristolochiaceae feeders with the Dispersal-Extinction-Cladogenesis (DEC) model. The  
1308 results show that the genus *Aristolochia* is the primary Aristolochiaceae host plant while  
1309 being also recovered as the ancestral feeding habit of the Papilionidae.



1310 **Supplementary Figure 7.** Phylogenetic relationships within the Aristolochiaceae (perianth-  
1311 bearing Piperales) for 247 species. The phylogeny is inferred with the Bayesian approach of  
1312 MrBayes. Node support is indicated by posterior probabilities, with values  $\geq 0.95$  considered  
1313 as strong node support.

1314 **Supplementary Figure 8.** Bayesian estimates of divergence times for Aristolochiaceae. The  
1315 first inference was performed with exponential priors on fossil calibrations and 150 Ma as  
1316 maximum age. The second inference was performed with exponential priors on fossil  
1317 calibrations and 221 Ma as maximum age. The third inference was performed with uniform  
1318 priors on fossil calibrations and 150 Ma as maximum age. The fourth inference was  
1319 performed with uniform priors on fossil calibrations and 221 Ma as maximum age. The origin  
1320 of the genus *Aristolochia* is estimated at 55.5 Ma (95% CI: 39.2-72.8 Ma) in the first  
1321 analysis, at 58.8 Ma (95% CI: 42.5-76.2 Ma) in the second analysis, at 60.7 Ma (95% CI:  
1322 43.9-80.5 Ma) in the third analysis, and at 64.8 Ma (95% CI: 47.3-83.1 Ma) in the fourth  
1323 analysis.

1324 **Supplementary Figure 9.** Median node ages and 95% credibility intervals (CI) for the two  
1325 dating analyses of Papilionidae and the four dating analyses of Aristolochiaceae. The 95% CI  
1326 overlap substantially between the two groups regardless of the dating analysis. J = Jurassic, Pl  
1327 = Pliocene, P = Pleistocene.

1328 **Supplementary Figure 10.** Estimation of the historical biogeography for the two molecular  
1329 dated trees of Papilionidae with the Dispersal-Extinction-Cladogenesis (DEC) model. For  
1330 each tree, two DEC analyses were performed: one with time-stratified palaeogeographic  
1331 constraints, and one without such constraints. The swallowtail butterflies originated in a  
1332 northern region centred around the Bering land bridge. K = Cretaceous, Pl = Pliocene, P =  
1333 Pleistocene.

1334 **Supplementary Figure 11.** Estimation of the historical biogeography for the four molecular  
1335 dated trees of Aristolochiaceae with the Dispersal-Extinction-Cladogenesis (DEC) model. For  
1336 each tree, two DEC analyses were performed: one with time-stratified palaeogeographic  
1337 constraints, and one without such constraints. The genus *Aristolochia* originated in a northern  
1338 region centred around the Bering land bridge. J = Jurassic, K = Cretaceous, Pl = Pliocene, P =  
1339 Pleistocene.

1340 **Supplementary Figure 12.** Trait-dependent diversification of Papilionidae linked to their  
1341 host plant. **a**, Bayesian inferences made with the full MuSSE model showed that speciation  
1342 rates vary according to the host-plant trait. **b**, Boxplots showing the increase of  
1343 diversification rates following host-plant shifts from the ancestral state (Aristolochiaceae).

1344 Only the species-poor swallowtail lineages feeding on Fabaceae, Zygophyllaceae and  
1345 Magnoliaceae show decrease of diversification rates.

1346 **Supplementary Figure 13.** Time-dependent diversification of Papilionidae after shifting to  
1347 new host plants. Diversification is inferred with the RPANDA models, and the best-fit model  
1348 is plotted showing rates through time for each clade. A model with increasing diversification  
1349 over time best fits the Aristolochiaceae feeders. A model with a slowdown of diversification  
1350 through time explained the diversification of Annonaceae feeders, Lauraceae feeders, and  
1351 Papaveraceae feeders. A model with constant rates through time best fits the diversification  
1352 of Apiaceae feeders, Crassulaceae feeders, and Rutaceae feeders. K = Cretaceous, PI =  
1353 Pliocene, P = Pleistocene.

1354 **Supplementary Figure 14.** Bayesian analysis of clade-specific and time-dependent  
1355 diversification of Papilionidae obtained with BAMM. a, Phylorate plot showing that global  
1356 diversification rates increase through time in Papilionidae with no significant rate shifts  
1357 detected by BAMM (the inset plot indicates the posterior probability for the estimated  
1358 number of shifts). b, Rate-through-time plots for selected swallowtail lineages feeding on  
1359 distinct host-plant families. The results also show an overall diversification increase through  
1360 time for each group of swallowtails. P = Palaeocene, E = Eocene, O = Oligocene, M =  
1361 Miocene.

1362 **Supplementary Figure 15.** Bayesian analysis of branch-specific and time-dependent  
1363 diversification of Papilionidae obtained with RevBayes. The median rates of diversification  
1364 are plotted along each branch of the phylogeny, which shows a global increase of  
1365 diversification rates through time in Papilionidae. Contrary to BAMM, this approach detected  
1366 shifts in diversification rates in particular within the genera *Parnassius* and *Papilio* that have  
1367 both shifted to new host-plant families. P = Palaeocene, E = Eocene, O = Oligocene, M =  
1368 Miocene.

1369 **Supplementary Figure 16.** Bayesian analysis of episodic diversification of Papilionidae  
1370 obtained with CoMET. The four plots represent speciation, extinction, net diversification, and  
1371 relative extinction rates through time for the whole family. The result indicates a global  
1372 increase of diversification rates over time, notably starting ~40 Ma. P = Palaeocene, E =  
1373 Eocene, O = Oligocene, M = Miocene.

1374 **Supplementary Figure 17.** Number of host plants consumed through time by Papilionidae.  
1375 Using the estimation of ancestral host-plant preferences (Supplementary Fig. 4), we plotted  
1376 the time at which a new host-plant family was colonised. This result shows that the  
1377 swallowtail butterflies have a steady increase in the number of host families consumed over

1378 time. This ecological diversification can be paralleled with the global increase in  
1379 diversification rates estimated by birth-death models (Supplementary Figs. 13-16). K =  
1380 Cretaceous, Pl = Pliocene, P = Pleistocene.

1381 **Supplementary Figure 18.** Genus-level phylogenomic tree of Papilionidae showing the 14  
1382 selected branches with host-plant shifts and the 14 selected branches without host-plant shifts  
1383 (control branches). The selection of these branches is based on the estimation of ancestral  
1384 state models using the species-level phylogenies and current host-plant preferences  
1385 (Supplementary Figs. 4, 5).

1386 **Supplementary Figure 19.** Violin plots of the percentage of missing data (“N” or “-”) and  
1387 proportion of GC at third codon position (GC3) in alignment were positive selection have  
1388 been detected (“Yes”) and positive selection have not been detected (“No”). Panels a and b  
1389 are dataset 1 with 520 genes, and panels c and d are dataset 2 with 1533 genes.

1390 **Supplementary Figure 20.** The percentage of missing data (“N” or “-”) per genes across  
1391 species computed for dataset 1 and dataset 2.

1392 **Supplementary Figure 21.** The percentage of missing data (“N” or “-”) per branch for the  
1393 branches with (“Yes”,  $n = 14$ ) and without (“No”,  $n = 14$ ) host-plant shift. For a given  
1394 branch, the percentage of missing data is the mean value of the species of a clade for which  
1395 the branch is the root.

1396 **Supplementary Figure 22.** Relationship between the percentage of missing data (“N” or “-”) and  
1397 the number of positively selected genes per branch. For a given branch, the percentage of  
1398 missing data is the mean value of the species of a clade for which the branch is the root.

1399 **Supplementary Figure 23.** The percentage of GC at third codon position (GC3) per gene  
1400 across species computed for dataset 1 and dataset 2.

1401 **Supplementary Figure 24.** The percentage of GC at third codon position (GC3) per branch  
1402 for the branches with (“Yes”,  $n = 14$ ) and without (“No”,  $n = 14$ ) host-plant shift. For a given  
1403 branch, the percentage of GC3 is the mean value of the species of a clade for which the  
1404 branch is the root.

1405 **Supplementary Figure 25.** Relationship between the percentage of GC at third codon  
1406 position (GC3) and the number of positively selected genes per branch. For a given branch,  
1407 the percentage of GC3 is the mean value of the species of a clade for which the branch is the  
1408 root.

1409 **Supplementary Table 1.** Results from analyses of diversification rates performed with  
1410 LASER. For clades shifting to new host plants, net diversification rates are estimated based  
1411 on their crown age and extant species diversity using the method of moments. Net

1412 diversification rates for shifting clades are higher than the global rates of the family,  
1413 suggesting that shifting to a new host plant confer higher rates of species diversification.  
1414 Estimates of expected clade size based on the global diversification rates and crown age of  
1415 shifting clades show that four clades diversified significantly faster than background  
1416 diversification rates of non-shifting clades.

1417 **Supplementary Table 2.** Information on orthogroups of dataset 2 (1,533 genes). The  
1418 columns 2 to 6 indicate whether the genes are under positive selection and along which  
1419 branch (column 'Branch ID' see Supplementary Fig. 18 for the annotated tree with branch  
1420 numbers). The column '*Papilio xuthus* seq ID' is the GenBank accession number for the  
1421 corresponding sequences in *Papilio xuthus*. The column 'PANTHER family:subfamily  
1422 accession' is family and subfamily accessions, and the column 'PANTHER family name' list  
1423 the names for gene families based on PANTHER classification (see <http://pantherdb.org/> for  
1424 more information). Finally, 'HMM e-value score' is the Hidden Markov model e-value score,  
1425 as reported by HMMER (Eddy 2011) performed through the online PANTHER scoring tool  
1426 [ftp://ftp.pantherdb.org/hmm\\_scoring/current\\_release](ftp://ftp.pantherdb.org/hmm_scoring/current_release). Following PANTHER  
1427 recommendation, we have not considered e-values above  $10^{-11}$  as significant.

1428

## Figures

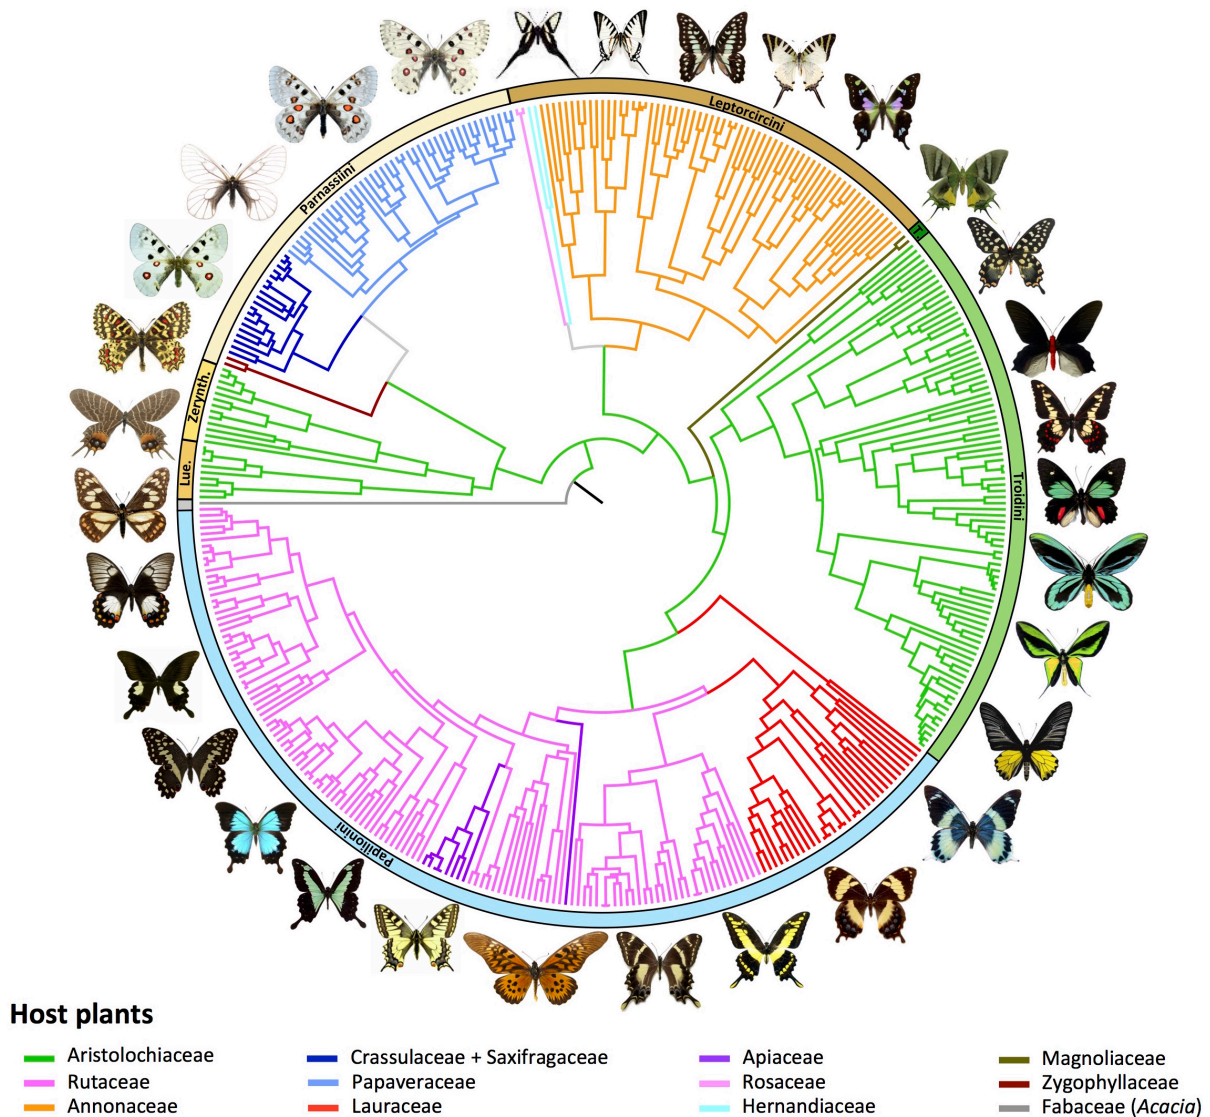

**Fig. 1. Evolution of host-plant association through time shows strong host-plant conservatism across swallowtail butterflies.** Phylogenetic relationships of swallowtail butterflies, with coloured branches mapping the evolution of host-plant association, as inferred by a maximum-likelihood model (Supplementary Figs. 4, 6). Additional analyses with two other maximum-likelihood and Bayesian models inferred the same host-plant associations across the phylogeny (Supplementary Fig. 5). Lue. = Luehdorfinae, Zerynth. = Zerynthiini, and T. = Teinopalpini.



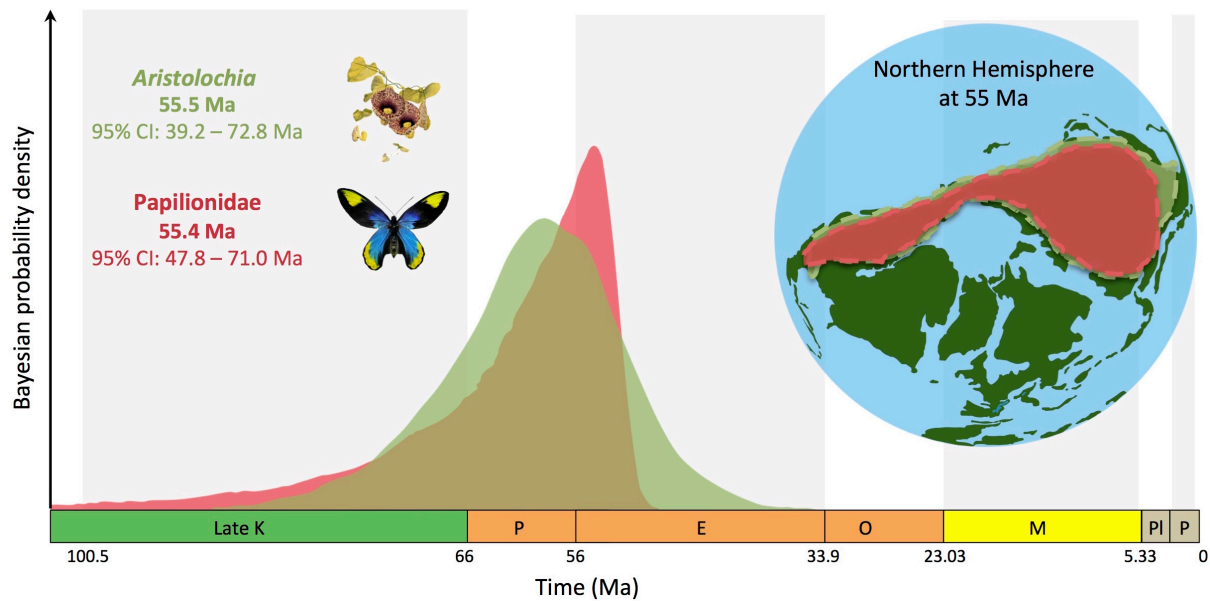

**Fig. 2. Synchronous temporal and geographic origin for swallowtails and birthworts.** Bayesian molecular divergence times with exponential priors estimate an early Eocene origin (~55 Ma) for both swallowtails and *Aristolochia* (alternatively, analyses with uniform prior estimated an origin around 67 Ma for swallowtails and 64 Ma for *Aristolochia*, Supplementary Figs. 3, 8, 9). Biogeographical maximum-likelihood models infer an ancestral area of origin comprising West Nearctic, East Palearctic and Central America for both swallowtails and birthworts (Supplementary Figs. 10, 11). K = Cretaceous, P = Palaeocene, E = Eocene, O = Oligocene, M = Miocene, Pl = Pliocene, and P = Pleistocene. Ma = million years ago.



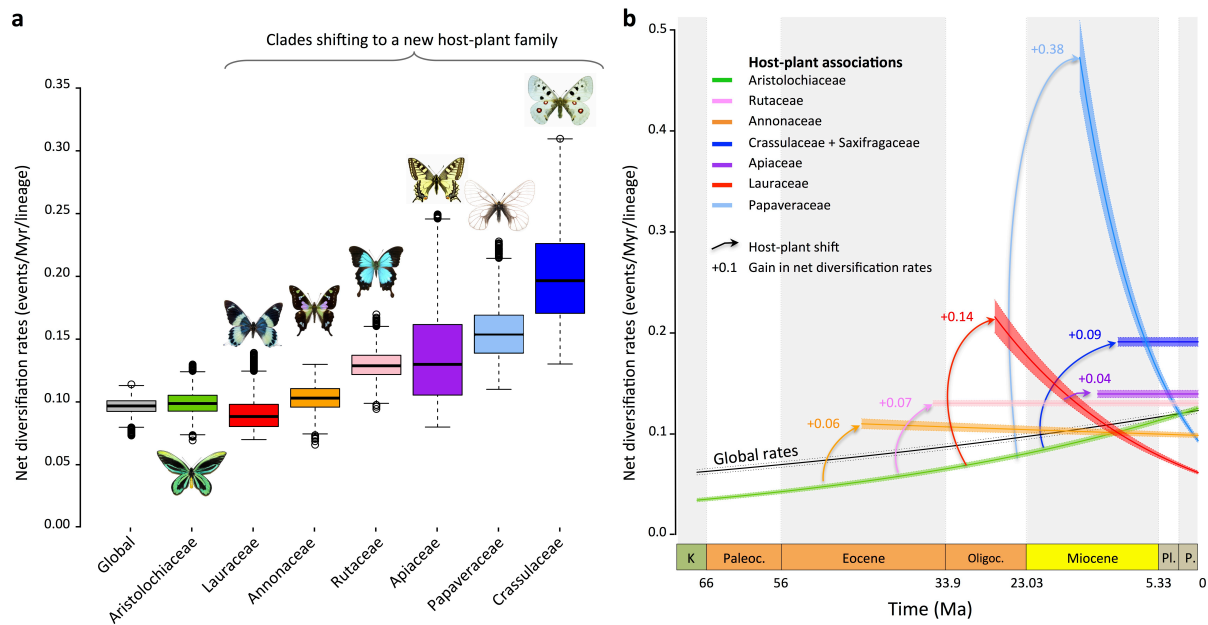

**Fig. 3. Host-plant shifts lead to repeated bursts in diversification rates and a sustained overall increase in diversification through time.** **a**, Diversification tends to be higher for clades shifting to new host plants, as estimated by trait-dependent diversification models. Boxplots represent Bayesian estimates of net diversification rates for clades feeding on particular host plants (see also Supplementary Fig. 12). **b**, A global increase in diversification is recovered with birth-death models estimating time-dependent diversification (see also Supplementary Figs. 14, 15). Taking into account rate heterogeneity by estimating host-plant and clade-specific diversification indicates positive gains of net diversification after shifting to new host plants (see also Supplementary Fig. 13). K = Cretaceous, Paleoc. = Palaeocene, Oligoc. = Oligocene, Pl = Pliocene, P = Pleistocene, Ma = million years ago.

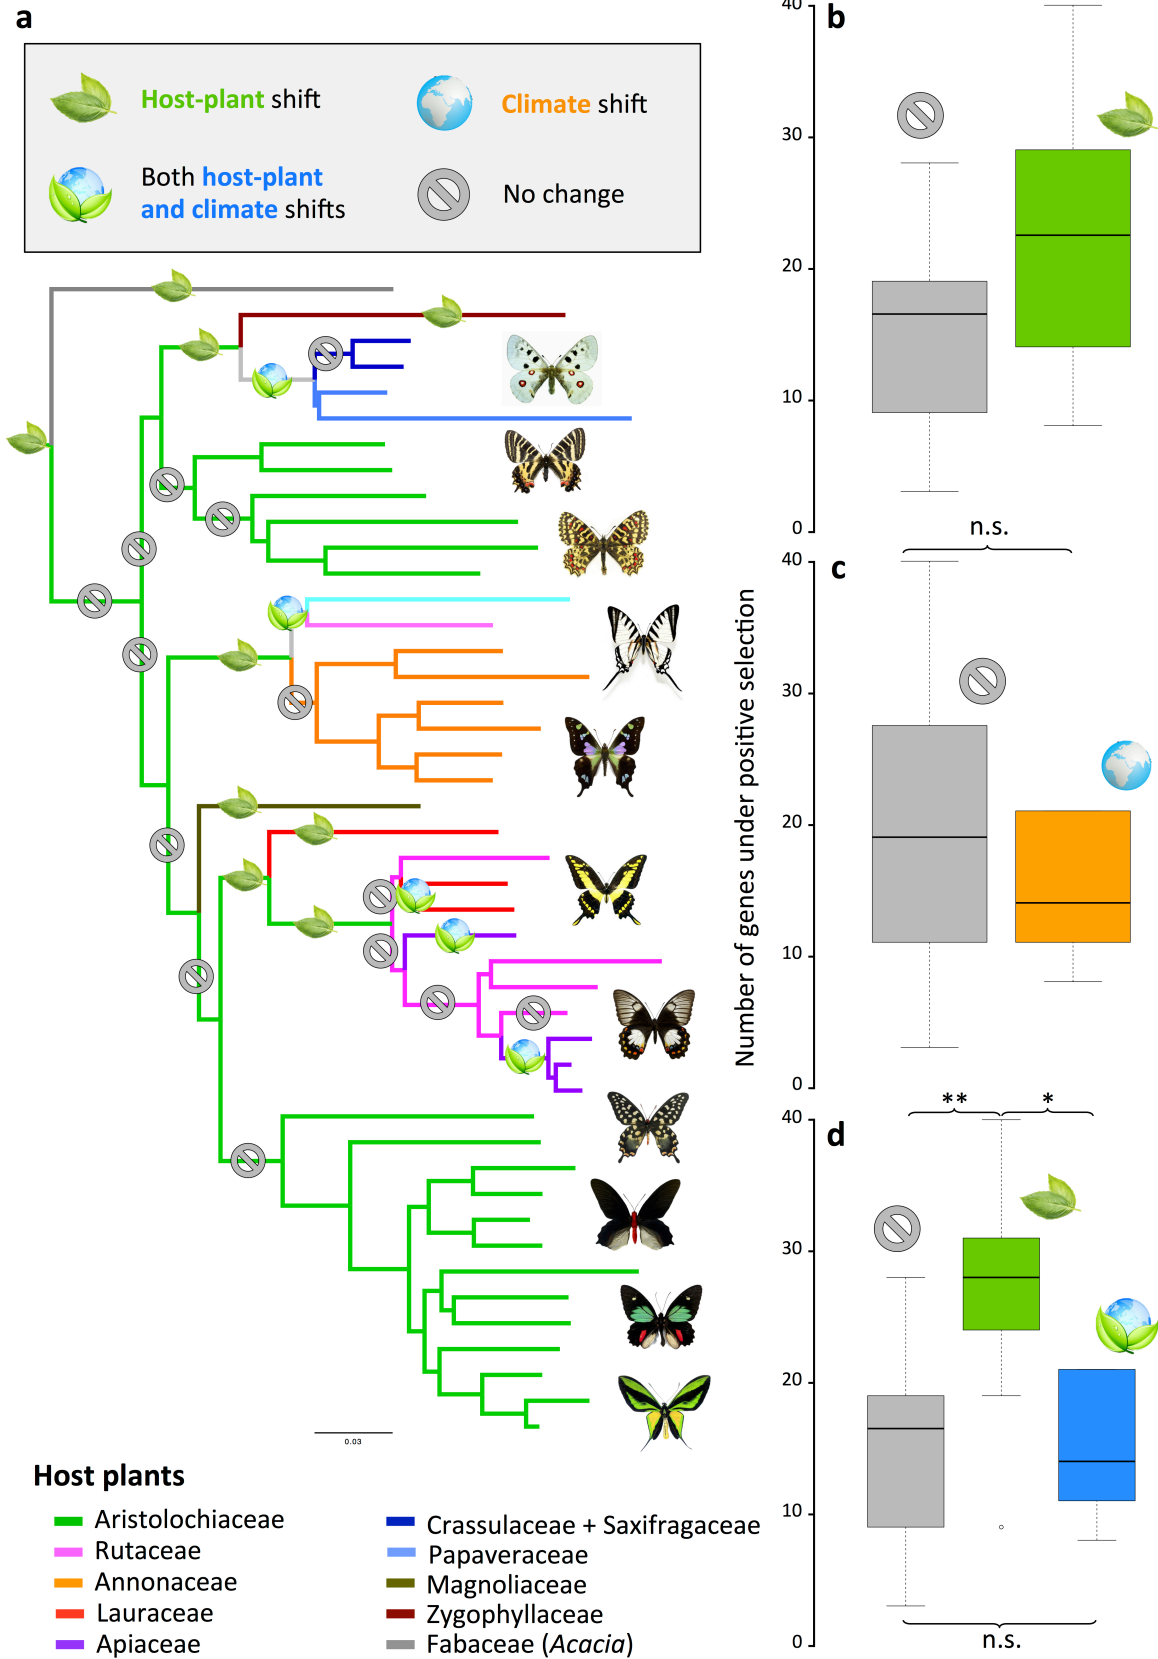

**Fig. 4. Host-plant shifts promote higher molecular adaptations.** **a**, Genus-level phylogenomic tree displaying branches with and without host-plant shifts, on which genome-wide analyses of molecular evolution are performed. **b**, Number of genes under positive selection ( $dN/dS > 1$ ) for swallowtail lineages shifting to new host-plant families (green) or not (grey). **c**, Number of genes under positive selection for swallowtail lineages undergoing climate shifts (orange) or not (grey). **d**, Number of genes under positive selection for swallowtail lineages shifting to new host plants (green), shifting both host plant and climate (blue) or not (grey). This demonstrates genome-wide signatures of adaptations in swallowtail lineages shifting to new host-plant families. Genes under positive selection did not contain over- or under-represented functional GO categories (Supplementary Table 2). n.s. = not significant ( $P > 0.05$ ), \* =  $P \leq 0.05$ , \*\* =  $P \leq 0.01$ .
